# Supplementary material
Source: Research Square preprint supplement (doi:10.21203/rs.3.rs-9651138/v1)
Supplement: Supplementary file 1 [file 4d9cde02a800e8cfc17fd8c7.docx]

Supplementary Information

Biosensor-assisted growth-coupled selection facilitates the evolution of glycosyltransferase for heparosan biosynthesis in Escherichia coli K5

Abbreviation and formatting note. cAMP-activated global transcriptional regulator (CRP), green fluorescent protein (GFP), optical density at 600 nm (OD600), polymerase chain reaction (PCR), electrophoretic mobility shift assay (EMSA), Gene Ontology (GO), sodium dodecyl sulfate-polyacrylamide gel electrophoresis (SDS-PAGE), reduced nicotinamide adenine dinucleotide (NADH), and whole-genome-evolved K5 (K5-WGE) are defined here for the Supplementary Information. Bacterial Latin binomials are italicized, gene names are italicized, and protein names are presented in roman type. Nomenclature note. Across the main text and Supplementary Tables S5-S6, the standardized construct names are used consistently as follows: pNG, pETDuet-1_*Pgnt*_*gfp*; pNT, pETDuet-1_*Pgnt*_*tetA*; NCT, pETDuet-1_*Pgnt*_*tetA*_P34_CRP; pNTG-CRP, pETDuet-1_*Pgnt*_*tetA*_*gfp*_Pbad_*crp*; pACYC-*NaKfiA/kfiC*, pACYC_P34_NaKfiA(mut)_P34_*kfiC*; K5AC, *E. coli* K5 Δ*kfiA* Δ*kfiC*. In the revised Figure 3 workflow, K5AC denotes the clean chassis used for benchmarking, pNG denotes the *Pgnt*-only GFP reporter plasmid, and pNTG-CRP denotes the CRP-assisted dual-output selection plasmid. Final Figure 3 method details: pNTG-CRP induction used 2 mg·mL−1 arabinose, induction was synchronized with culture transfer, mixed-population validation used OD600 = 0.01 normalization, and endpoint genotyping was performed by colony PCR followed by Sanger sequencing. CRP-assisted circuit construction denotes additional biosensor-plasmid-borne CRP expression in a CRP-positive K5AC background, not complementation of a CRP-deficient chassis.

Section I. Genome editing, transcriptomic prioritization, and Pgnt characterization

Supplementary Figure S1. Raw PCR gel for Δ*kfiA* validation.


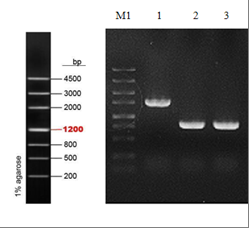


Lane M1, DNA Marker III; lane 1, K5 fragment; lane 2, K5A fragment; lane 3, positive control.

Supplementary Figure S2. K5 versus K5A MA plot.


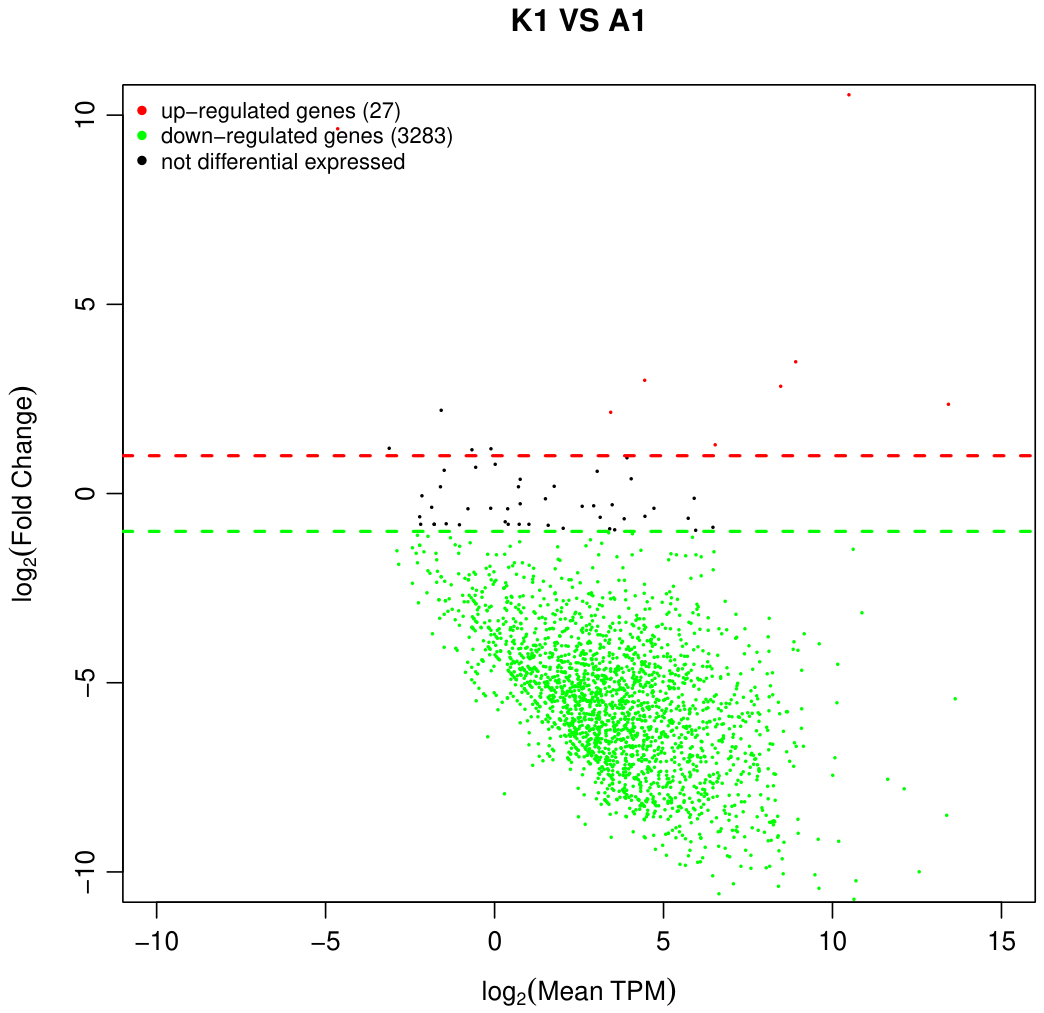


MA plot for K5 versus K5A.

Supplementary Figure S3. K5 versus K5A volcano plot.


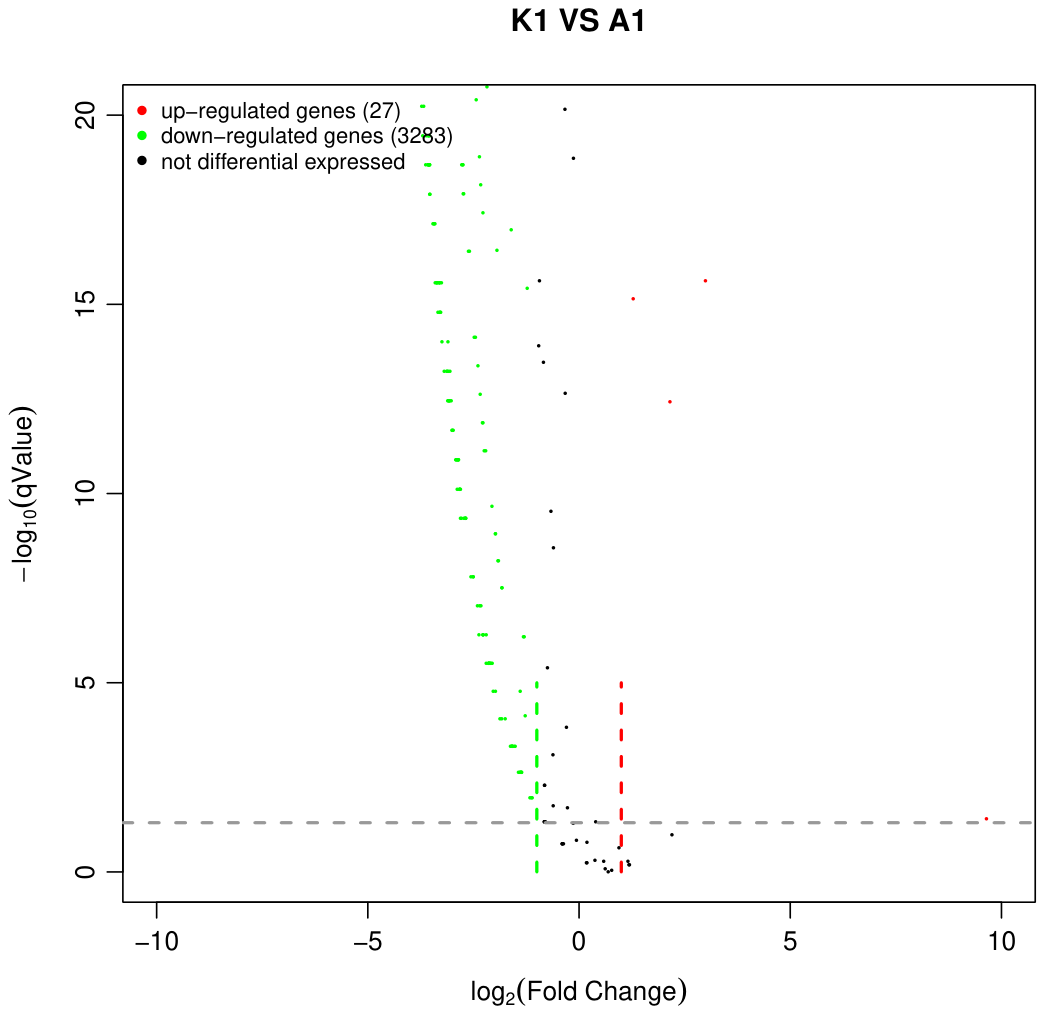


Volcano plot for K5 versus K5A.

Supplementary Figure S4. K5 versus K5A GO enrichment support.


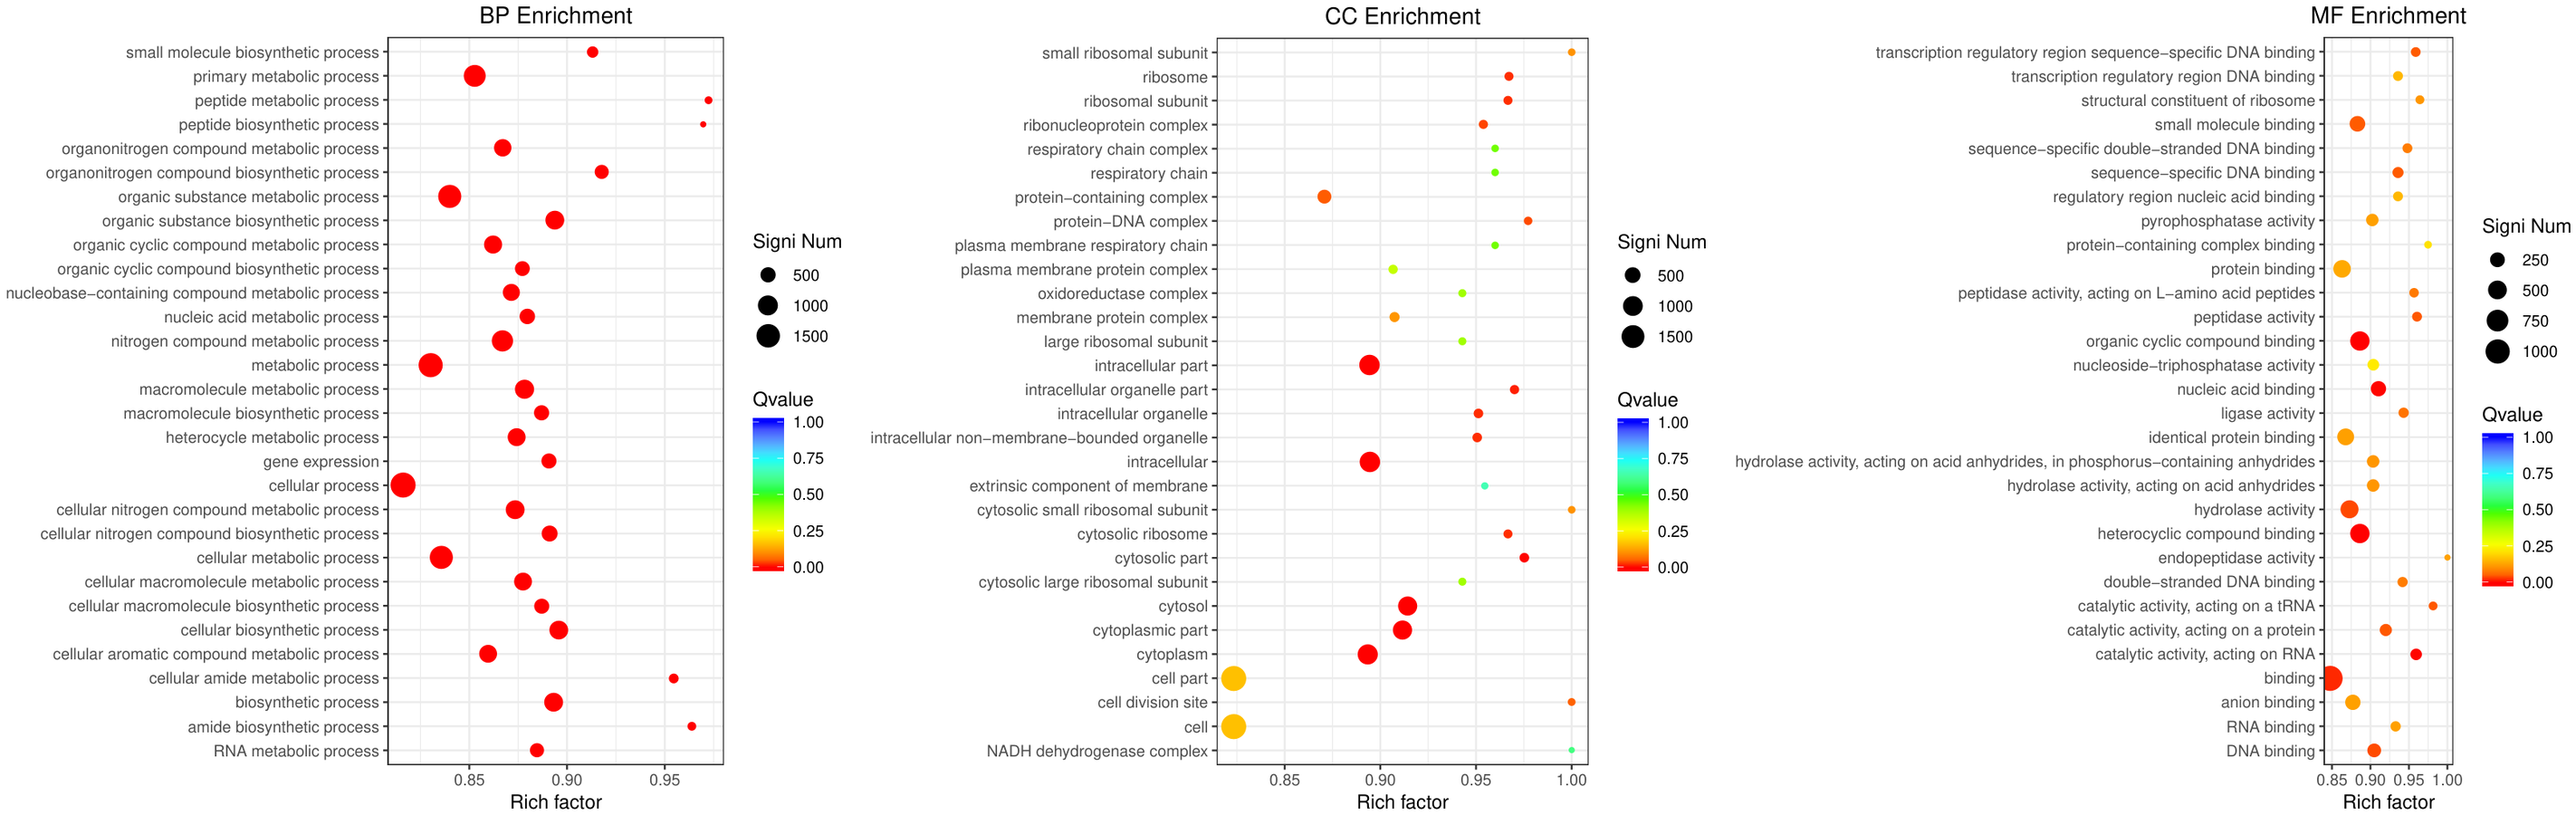


GO enrichment summary for K5 versus K5A.

Supplementary Table S1. Description of COG terms shown in Figure 1D.

COG identifiers and descriptions corresponding to the COG-focused enrichment overview in Figure 1D.

| **COG ID** | **Description** |
| --- | --- |
| COG1216 | Predicted glycosyltransferases |
| COG3550 | Uncharacterized protein related to capsule biosynthesis enzymes |
| COG0438 | Glycosyltransferase |
| COG0463 | Glycosyltransferases involved in cell wall biogenesis |
| COG0859 | ADP-heptose:LPS heptosyltransferase |
| COG1087 | UDP-glucose-4-epimerase |
| COG1088 | dTDP-D-glucose 4,6-dehydratase |
| COG0794 | Predicted sugar phosphate isomerase involved in capsule formation |
| COG1442 | Lipopolysaccharide biosynthesis proteins, LPS:glycosyltransferases |
| COG0707 | UDP-N-acetylglucosamine:LPS N-acetylglucosamine transferase |
| COG1089 | GDP-D-mannose dehydratase |
| COG1091 | dTDP |
| COG1210 | UDP-glucose pyrophosphorylase |
| COG2943 | Membrane glycosyltransferase |
| COG3524 | Capsule polysaccharide export protein |
| COG3563 | Capsule polysaccharide export protein |
| COG1596 | Periplasmic protein involved in polysaccharide export |
| COG1898 | dTDP-4-dehydrorhamnose 3,5-epimerase and related enzymes |
| COG1134 | ABC-type polysaccharide/polyol phosphate transport system, ATPase component |
| COG1682 | ABC-type polysaccharide/polyol phosphate export system, permease component |

Section II. DNA pull-down-based prioritization of Pgnt-associated regulatory candidates and preliminary EMSA support

Supplementary Figure S5. DNA pull-down assay schematic.


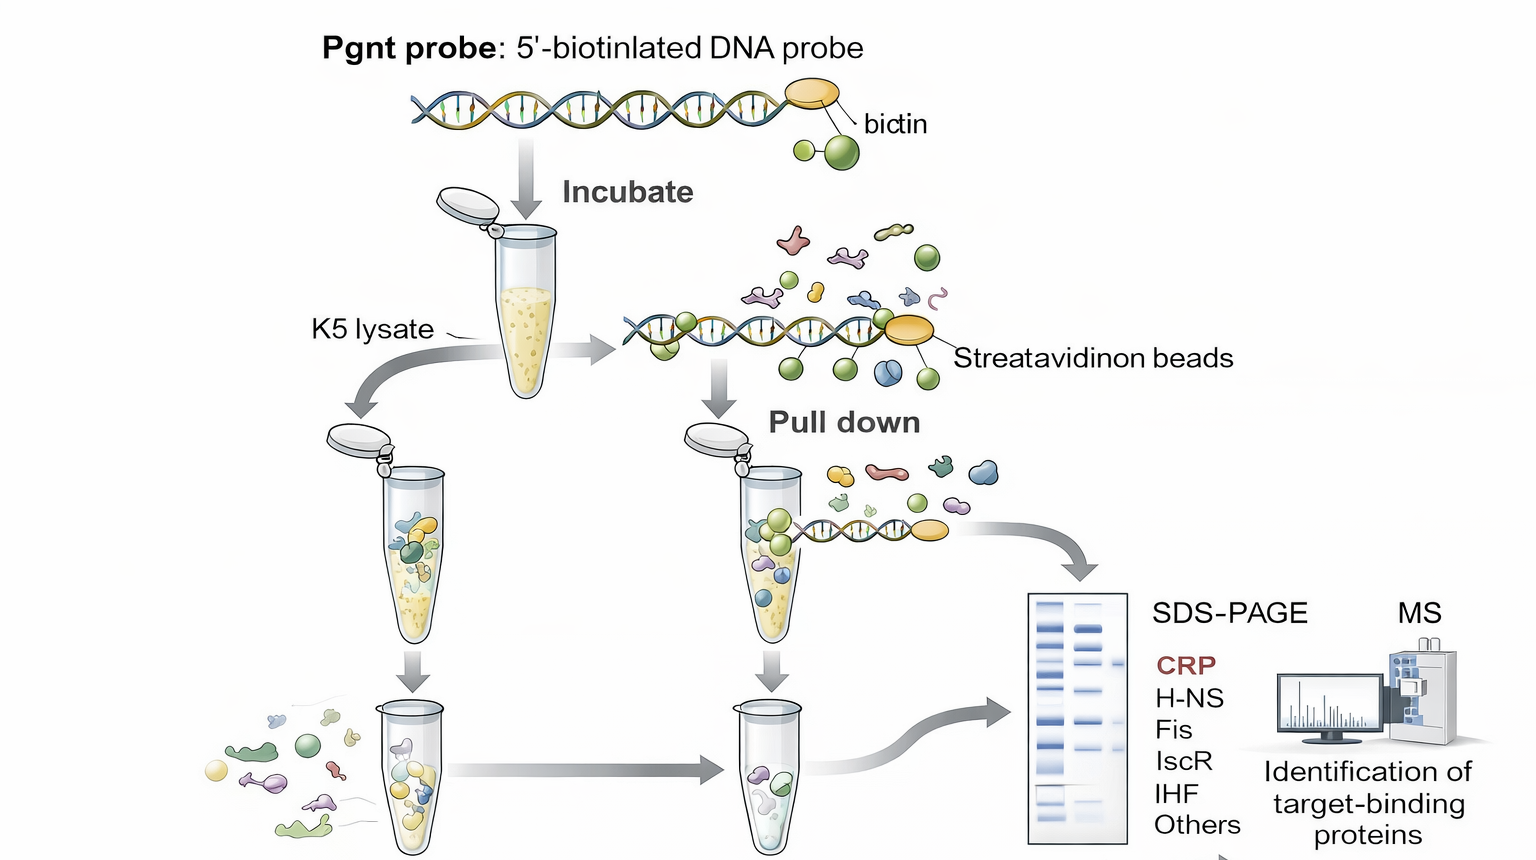


Schematic of the DNA pull-down workflow using a 5'-biotinylated *Pgnt* DNA probe, *Escherichia coli* K5 lysate, streptavidin magnetic beads, SDS-PAGE and LC-MS/MS.

Supplementary Figure S6. *Pgnt* probe agarose gel.


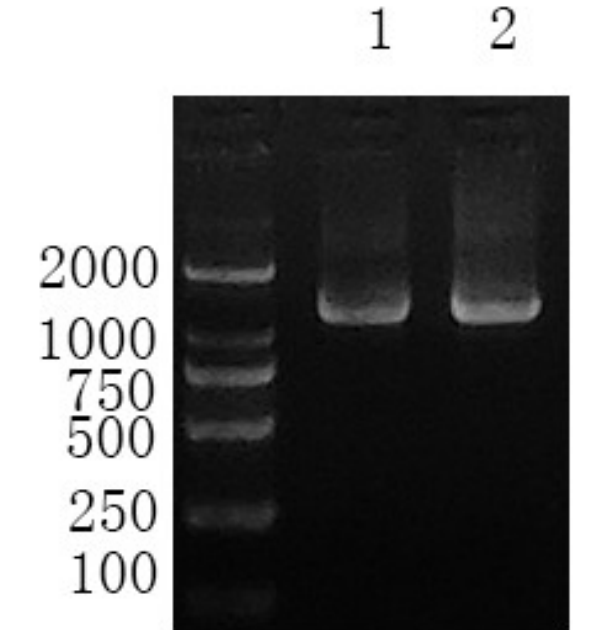


Lane 1, unlabeled *Pgnt*; lane 2, biotin-labeled *Pgnt*.

Supplementary Figure S7. *Pgnt* pull-down workflow support gels.


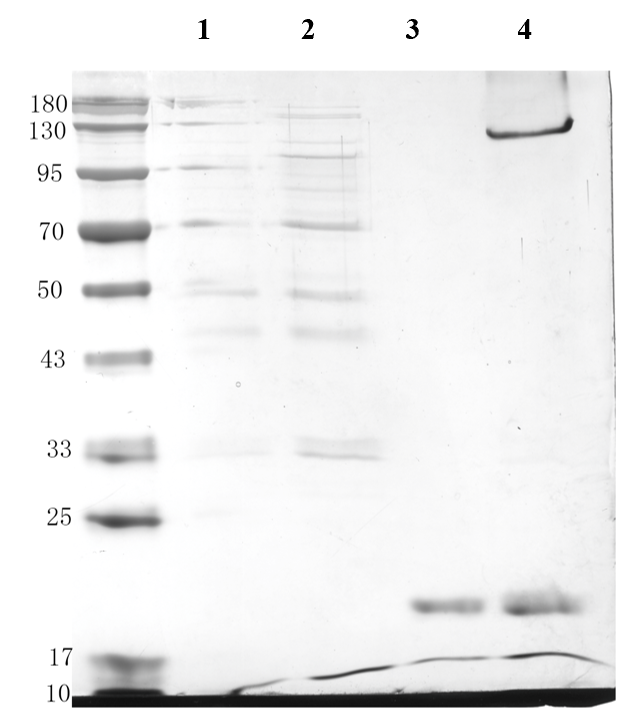


Lane 1, DNA pull-down control group; lane 2, DNA pull-down experimental group; lane 3, magnetic-bead control group; lane 4, magnetic-bead experimental group.

Supplementary Figure S8. GO term distribution of Sample 1-specific proteins.


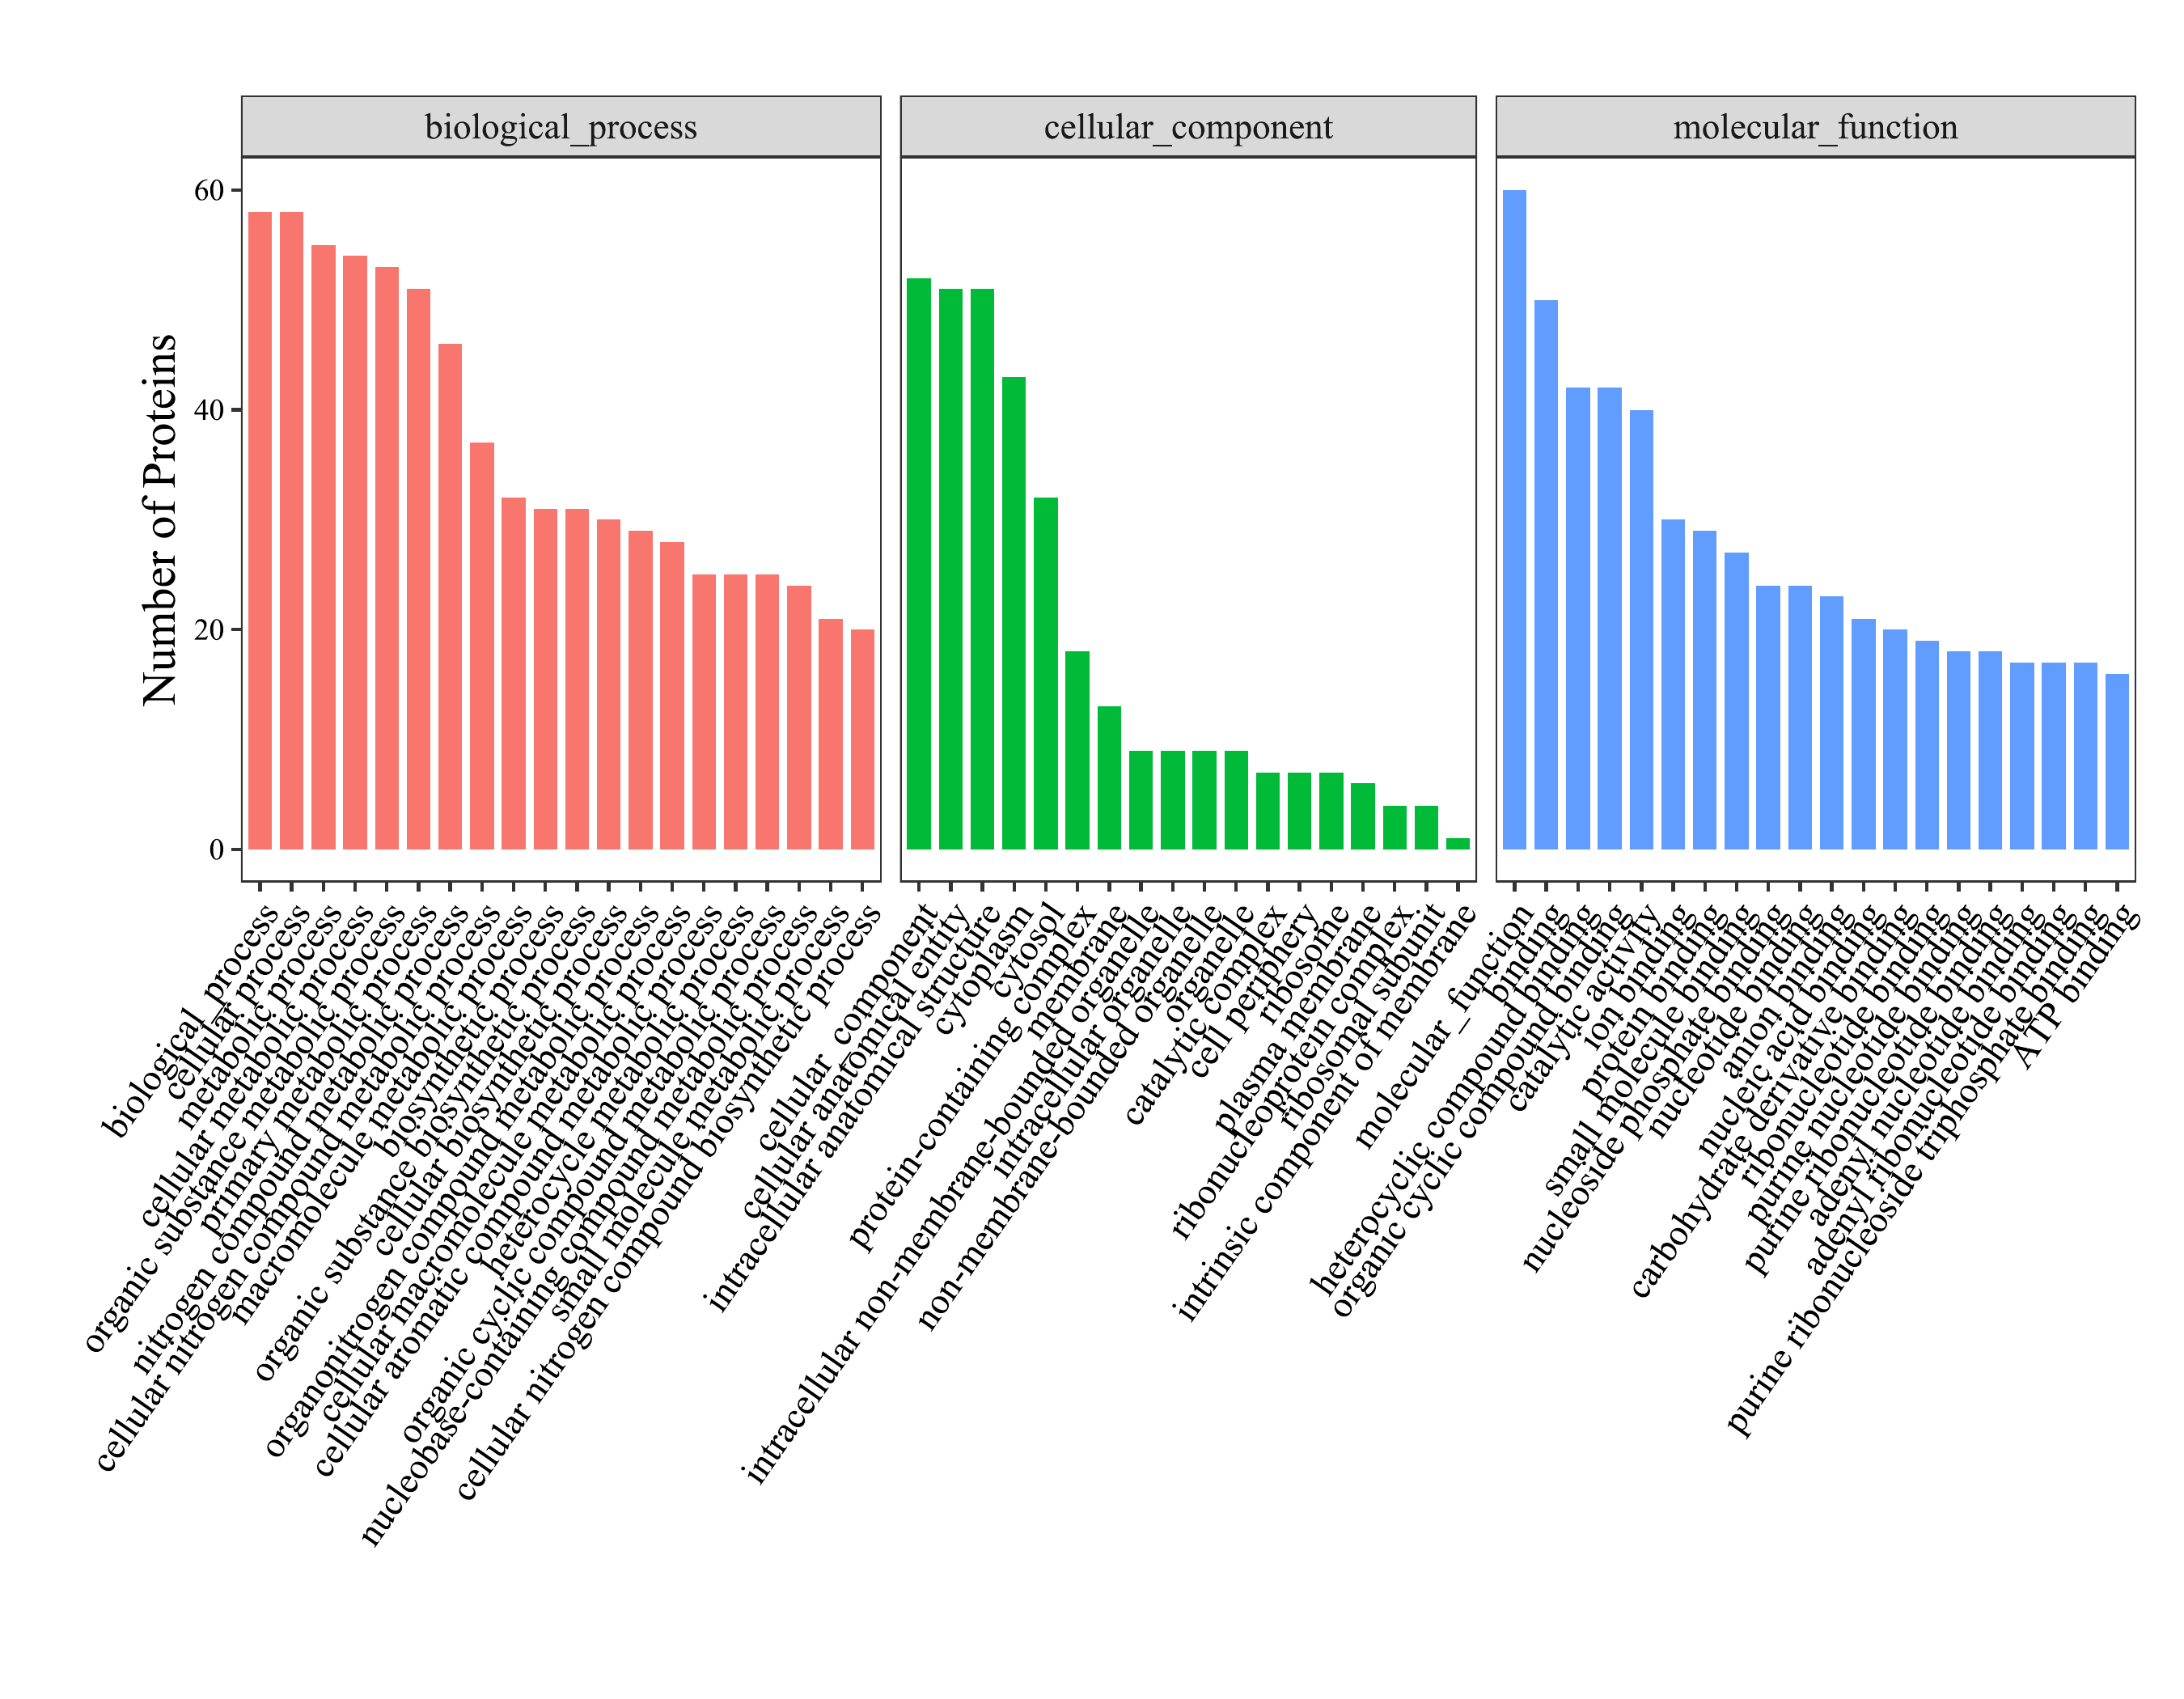


GO-term distribution of Sample 1-specific proteins from the *Pgnt*-group DNA pull-down analysis.

Supplementary Figure S9. *Pgnt*-group pathway composition.


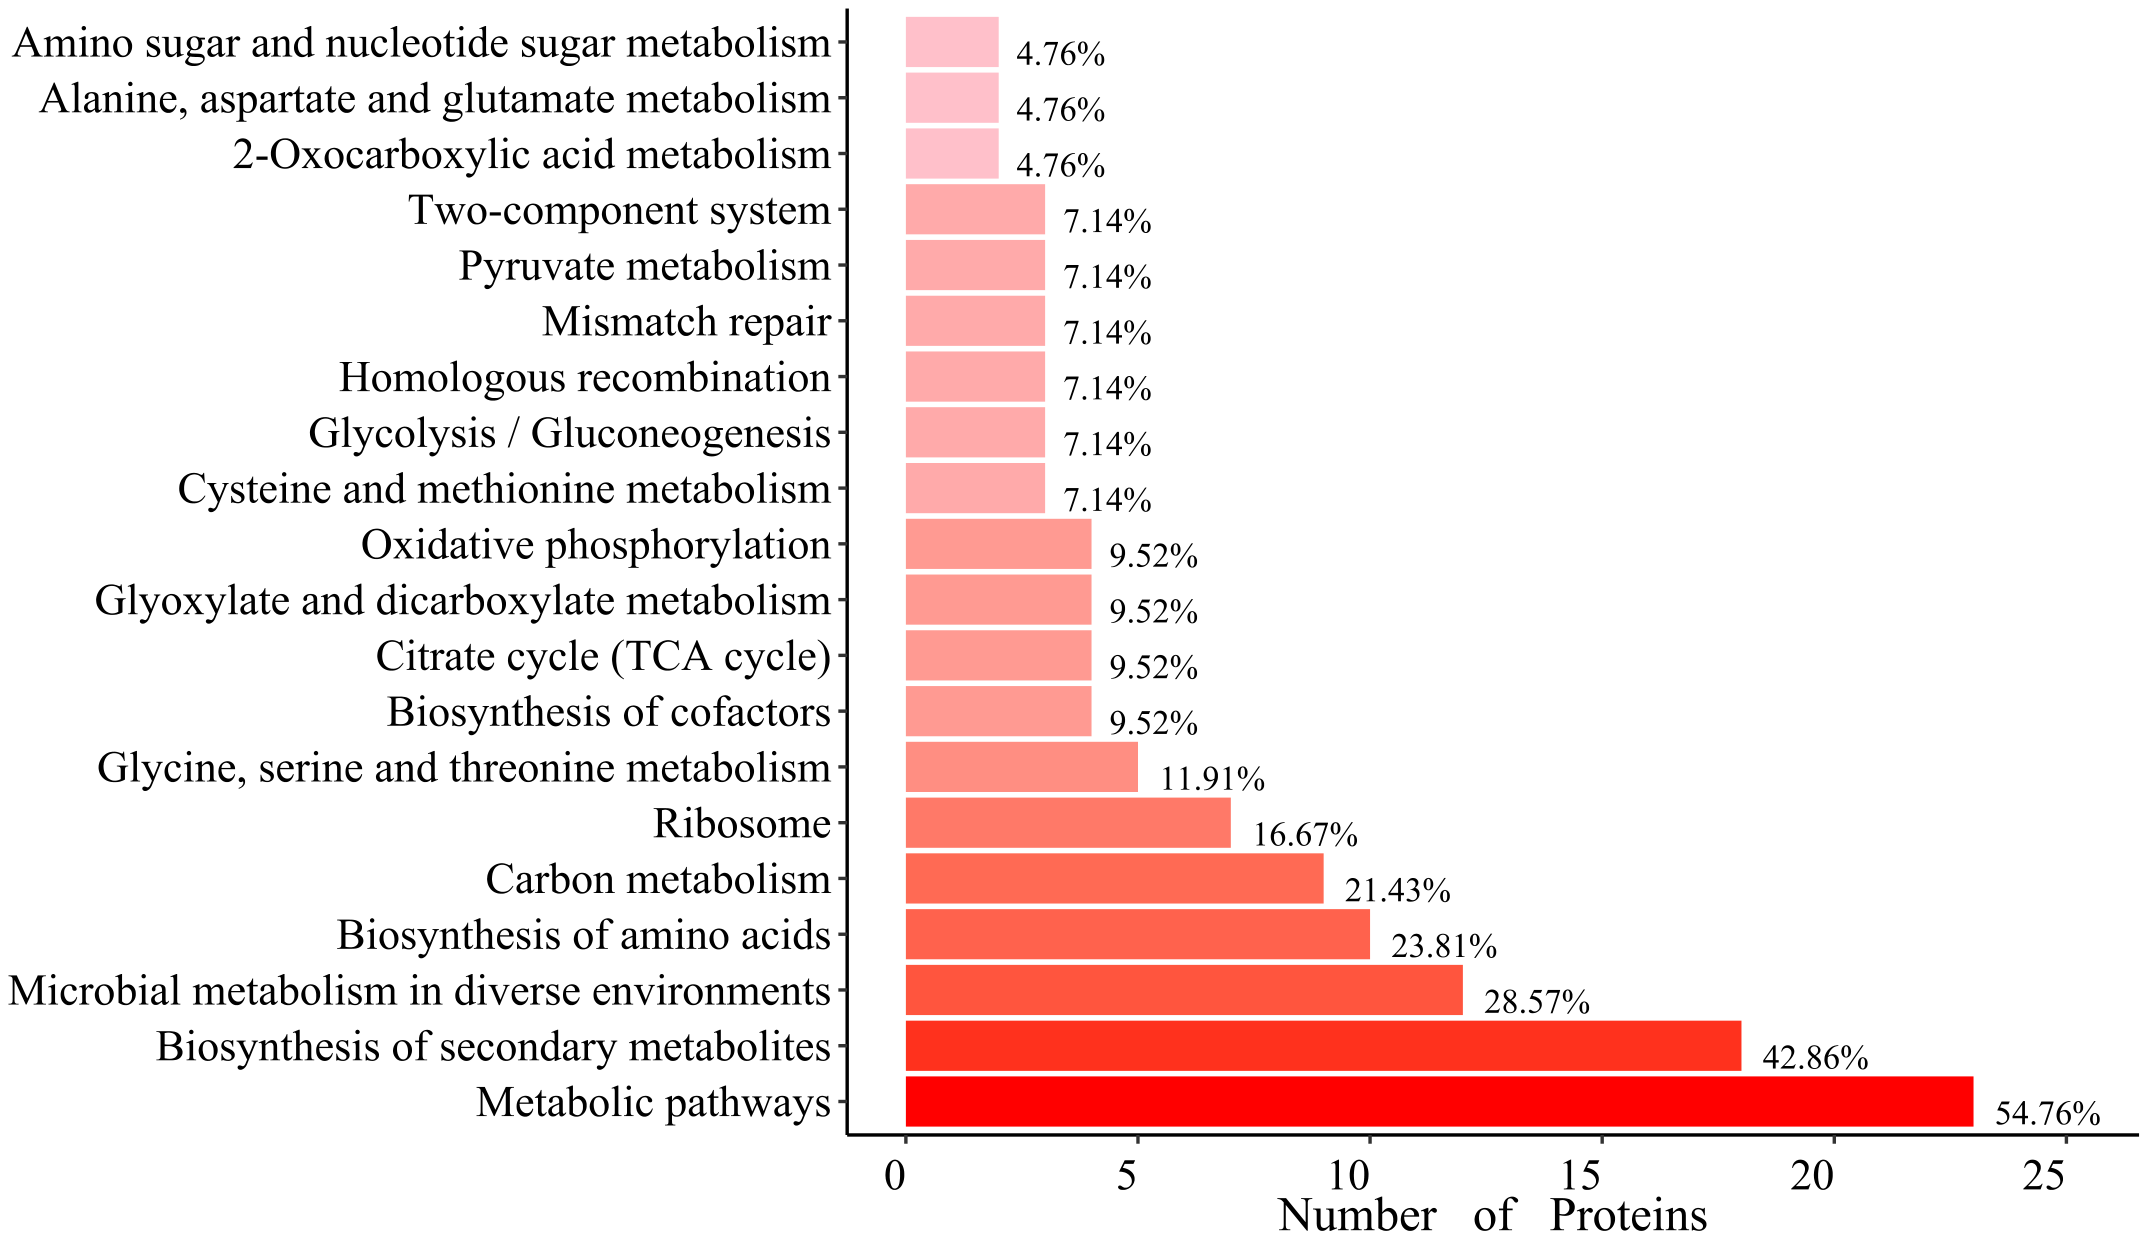


Pathway-composition summary for Sample 1.

Supplementary Figure S10. *Pgnt*-group protein interaction network.


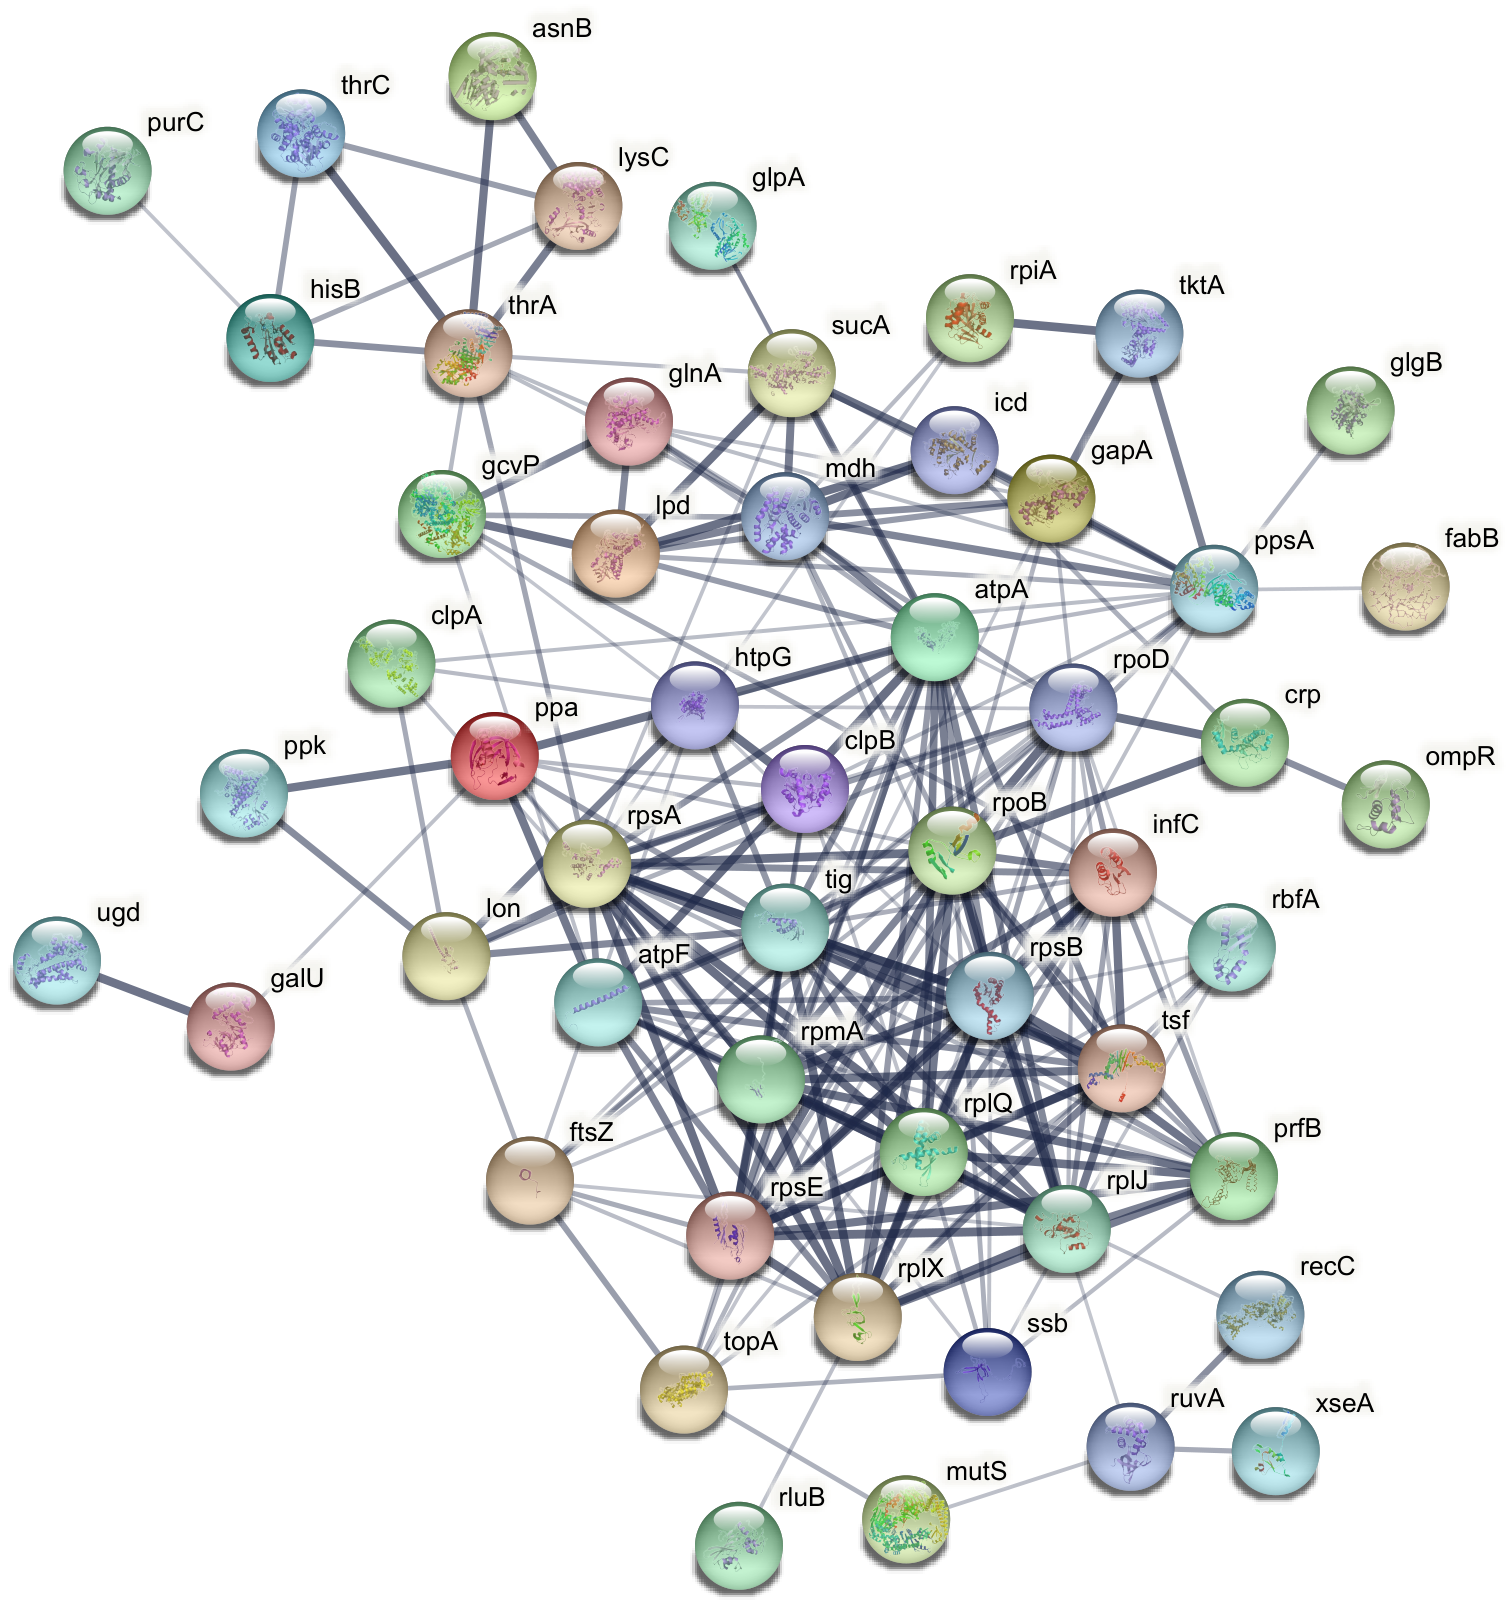


Interaction-network view for Sample 1.

Supplementary Figure S11. Preliminary EMSA analysis of CRP with a *Pgnt*-derived DNA probe.


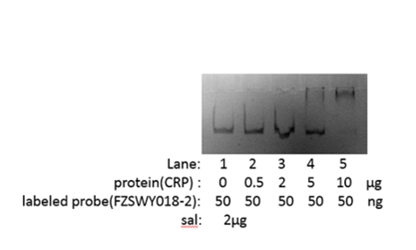


Purified CRP was incubated with the labeled *Pgnt*-derived probe FZSWY018-2 and analyzed by native gel electrophoresis. Lane 1, probe only; lanes 2-5, probe plus 0.5, 2, 5 and 10 µg CRP, respectively. Each reaction contained 50 ng labeled probe and 2 µg salmon sperm DNA.

Section III. CRP-assisted platform construction and validation

Supplementary Figure S12. Raw PCR gel for Δ*kfiC* validation.


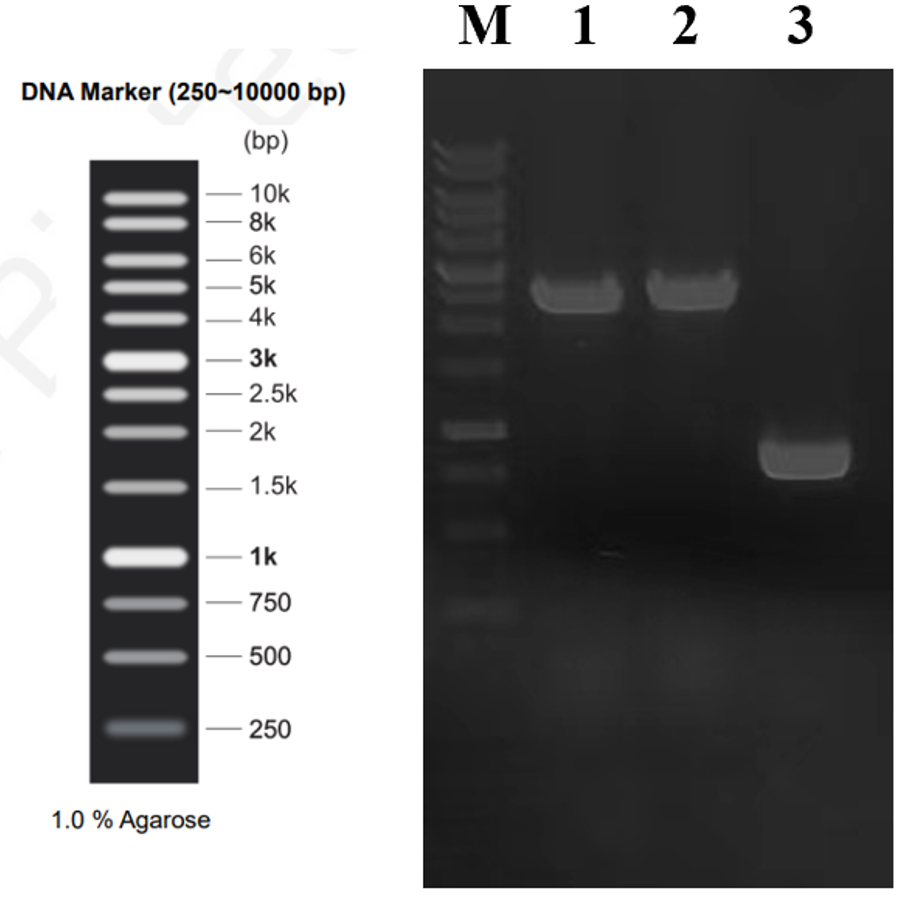


Lane M, DNA marker (250-10000 bp); lane 1, K5 wild-type fragment; lane 2, K5A fragment; lane 3, K5AC fragment.

**Supplementary Data S1. NaKfiA benchmark coding-sequence records used for Figure 3 platform validation**

This standalone supplementary data item provides the coding-sequence records for the five NaKfiA benchmark variants used to validate the CRP-assisted Pgnt selection platform in Figure 3. Coding sequences are shown in the 5'-to-3' orientation and formatted as FASTA-style records to facilitate direct sequence checking, primer design, and construct verification. Protein-level annotations are limited to the benchmark substitution and mutant codon supplied with the construct records; the corresponding constructs pair each NaKfiA variant with *kfiC* on the pACYC_P34_NaKfiA(mut)_P34_*kfiC* plasmid.

**Supplementary Data S1A. Summary of NaKfiA benchmark sequence records.**

| **Variant** | **Benchmark substitution / codon** | **Source header(s)** | **CDS length (bp)** | **Figure 3 use** |
| --- | --- | --- | --- | --- |
| T108Y | T108Y; mutant codon TAT | NaKfiA_T108Y; NaKfiA_T108Y | 753 | Activity-gradient benchmark variant for circuit validation. |
| I76V | I76V; mutant codon GTA | pET30a(+)_NaKfiA_I76V; pET30a(+)_NaKfiA_I76V | 753 | Activity-gradient benchmark variant for circuit validation. |
| E74Y | E74Y; mutant codon TAT | NaKfiA_E74Y; NaKfiA_E74Y | 753 | Activity-gradient benchmark variant for circuit validation. |
| WT/NaKfiA | Reference NaKfiA sequence | NaKfiA; NaKfiA | 774 | Parental NaKfiA reference in the benchmark panel. |
| S165K | S165K; mutant codon AAA | NaKfiA_S165K; NaKfiA_S165K | 753 | Highest-activity endpoint benchmark enriched in mixed-population serial passage. |

**Supplementary Data S1B. FASTA-style coding-sequence records.**

**T108Y**

**>T108Y | T108Y; mutant codon TAT | source=NaKfiA_T108Y; NaKfiA_T108Y | length=753 bp**ATGATAATAGCTAATATGGCAACATTTCCCGCTAGGGTAGAAATATGTAAACAAGTGGTTGATAGC
ATCTACAACCAGGTTGACCAAATTAACCTGTGCTTCAACGAGTTTAAGCAGATCCCGAAAGAATAC
GCGAAGTATCACAAACTGAACCCGGTGATTCCGGATACCGACTATAAGGATGTTGGTAAATTTGTG
CACAAAGTTAGCGATAACGACGAGGTGATCCTGATTGACGATGACATCATTTACCCGCGTGACTAT
GTGGAAGTTCTGCGTTACTTCTATAAGAAATACCAACACCTGAACATCATTGTTGGTTATCACGGC
ATCATTTACCCGGATCTGTATGACGGCAGCGTGAGCAGCCGTAAGGTTTTCACCTTTAAACACAGC
CTGAAGCGTCCGCGTGTGGTTAACCAGCTGGGTACCGGCACCGTGTACCTGAAAGGTAGCCAAATG
CCGAGCCTGGAGTATATGAAGGGCAGCCAGAGCTTCGTGGATGTTCGTTTTAGCAAATACATGTTC
GAAAAGGGTATCGGCCTGATCTGCATTCCGCGTGGTGCGGATTGGCAAAAGGAGATCAAACAGGAA
GACAGCATTTTCAACAACTTTACCAGCAAATGGCCGATGCAGGTGATCCAAGAAGTTCAGATCATT
GCGGGCTATAGCAAGCTGCCGTTTAACCTGGTTAAAGAGATTGAATTCAACAAGGACAGCCTGCTG
ATGAGCCAACACCACCACCACCACCAC

**I76V**

**>I76V | I76V; mutant codon GTA | source=pET30a(+)_NaKfiA_I76V; pET30a(+)_NaKfiA_I76V | length=753 bp**ATGATAATAGCTAATATGGCAACATTTCCCGCTAGGGTAGAAATATGTAAACAAGTGGTTGATAGC
ATCTACAACCAGGTTGACCAAATTAACCTGTGCTTCAACGAGTTTAAGCAGATCCCGAAAGAATAC
GCGAAGTATCACAAACTGAACCCGGTGATTCCGGATACCGACTATAAGGATGTTGGTAAATTTGTG
CACAAAGTTAGCGATAACGACGAGGTGGTACTGATTGACGATGACATCATTTACCCGCGTGACTAT
GTGGAAGTTCTGCGTTACTTCTATAAGAAATACCAACACCTGAACATCATTGTTGGTACCCACGGC
ATCATTTACCCGGATCTGTATGACGGCAGCGTGAGCAGCCGTAAGGTTTTCACCTTTAAACACAGC
CTGAAGCGTCCGCGTGTGGTTAACCAGCTGGGTACCGGCACCGTGTACCTGAAAGGTAGCCAAATG
CCGAGCCTGGAGTATATGAAGGGCAGCCAGAGCTTCGTGGATGTTCGTTTTAGCAAATACATGTTC
GAAAAGGGTATCGGCCTGATCTGCATTCCGCGTGGTGCGGATTGGCAAAAGGAGATCAAACAGGAA
GACAGCATTTTCAACAACTTTACCAGCAAATGGCCGATGCAGGTGATCCAAGAAGTTCAGATCATT
GCGGGCTATAGCAAGCTGCCGTTTAACCTGGTTAAAGAGATTGAATTCAACAAGGACAGCCTGCTG
ATGAGCCAACACCACCACCACCACCAC

**E74Y**

**>E74Y | E74Y; mutant codon TAT | source=NaKfiA_E74Y; NaKfiA_E74Y | length=753 bp**ATGATAATAGCTAATATGGCAACATTTCCCGCTAGGGTAGAAATATGTAAACAAGTGGTTGATAGC
ATCTACAACCAGGTTGACCAAATTAACCTGTGCTTCAACGAGTTTAAGCAGATCCCGAAAGAATAC
GCGAAGTATCACAAACTGAACCCGGTGATTCCGGATACCGACTATAAGGATGTTGGTAAATTTGTG
CACAAAGTTAGCGATAACGACTATGTGATCCTGATTGACGATGACATCATTTACCCGCGTGACTAT
GTGGAAGTTCTGCGTTACTTCTATAAGAAATACCAACACCTGAACATCATTGTTGGTACCCACGGC
ATCATTTACCCGGATCTGTATGACGGCAGCGTGAGCAGCCGTAAGGTTTTCACCTTTAAACACAGC
CTGAAGCGTCCGCGTGTGGTTAACCAGCTGGGTACCGGCACCGTGTACCTGAAAGGTAGCCAAATG
CCGAGCCTGGAGTATATGAAGGGCAGCCAGAGCTTCGTGGATGTTCGTTTTAGCAAATACATGTTC
GAAAAGGGTATCGGCCTGATCTGCATTCCGCGTGGTGCGGATTGGCAAAAGGAGATCAAACAGGAA
GACAGCATTTTCAACAACTTTACCAGCAAATGGCCGATGCAGGTGATCCAAGAAGTTCAGATCATT
GCGGGCTATAGCAAGCTGCCGTTTAACCTGGTTAAAGAGATTGAATTCAACAAGGACAGCCTGCTG
ATGAGCCAACACCACCACCACCACCAC

**WT/NaKfiA**

**>WT_NaKfiA | Reference NaKfiA sequence | source=NaKfiA; NaKfiA | length=774 bp**ATGATTATAGCTAATATGGCAACATTTCCCGCGCGTGTTGAGATCTGTAAGCAAGTCGTTGACTCC
ATCTACAATCAGGTGGACCAGATCAACCTGTGCTTCAACGAGTTCAAACAGATTCCGAAGGAGTAC
GCAAAATACCATAAGTTGAACCCGGTTATTCCGGACACCGACTATAAGGACGTGGGCAAATTCGTG
CACAAAGTTTCGGATAATGATGAAGTGATCCTGATTGATGACGACATTATCTACCCGCGCGATTAC
GTCGAGGTGCTGCGTTATTTCTATAAAAAGTACCAGCACCTGAATATTATCGTGGGCACGCATGGT
ATTATCTACCCGGATCTGTATGATGGTTCTGTTTCTAGCCGTAAGGTGTTTACCTTCAAGCACAGC
CTGAAACGTCCGCGCGTTGTTAATCAACTGGGTACTGGTACCGTGTATCTTAAGGGCTCCCAAATG
CCATCTCTGGAATATATGAAAGGTTCCCAGAGCTTCGTGGACGTTCGTTTTAGCAAGTACATGTTT
GAAAAAGGCATCGGCCTGATCTGCATCCCGCGCGGTGCTGATTGGCAGAAAGAAATCAAGCAAGAA
GATAGCATTTTTAACAACTTCACCAGCAAGTGGCCGATGCAGGTCATTCAGGAGGTACAGATTATC
GCGGGTTATAGCAAGTTGCCTTTTAACTTGGTTAAAGAGATTGAATTCAACAAAGACTCCCTCTTA
ATGAGCCAAAAGCTTGCGGCCGCACTCGAGCACCACCACCACCACCAC

**S165K**

**>S165K | S165K; mutant codon AAA | source=NaKfiA_S165K; NaKfiA_S165K | length=753 bp**ATGATAATAGCTAATATGGCAACATTTCCCGCTAGGGTAGAAATATGTAAACAAGTGGTTGATAGC
ATCTACAACCAGGTTGACCAAATTAACCTGTGCTTCAACGAGTTTAAGCAGATCCCGAAAGAATAC
GCGAAGTATCACAAACTGAACCCGGTGATTCCGGATACCGACTATAAGGATGTTGGTAAATTTGTG
CACAAAGTTAGCGATAACGACGAGGTGATCCTGATTGACGATGACATCATTTACCCGCGTGACTAT
GTGGAAGTTCTGCGTTACTTCTATAAGAAATACCAACACCTGAACATCATTGTTGGTACCCACGGC
ATCATTTACCCGGATCTGTATGACGGCAGCGTGAGCAGCCGTAAGGTTTTCACCTTTAAACACAGC
CTGAAGCGTCCGCGTGTGGTTAACCAGCTGGGTACCGGCACCGTGTACCTGAAAGGTAGCCAAATG
CCGAGCCTGGAGTATATGAAGGGCAGCCAGAAATTCGTGGATGTTCGTTTTAGCAAATACATGTTC
GAAAAGGGTATCGGCCTGATCTGCATTCCGCGTGGTGCGGATTGGCAAAAGGAGATCAAACAGGAA
GACAGCATTTTCAACAACTTTACCAGCAAATGGCCGATGCAGGTGATCCAAGAAGTTCAGATCATT
GCGGGCTATAGCAAGCTGCCGTTTAACCTGGTTAAAGAGATTGAATTCAACAAGGACAGCCTGCTG
ATGAGCCAACACCACCACCACCACCAC

Figure 3 source-data synchronization note. The NaKfiA benchmark panel in Figure 3 was evaluated in the K5AC chassis using *Pgnt*-only and CRP-assisted dual-plasmid configurations. For the CRP-assisted configuration, *crp* expression was induced with 2 mg·mL−1 arabinose and induction was synchronized with culture transfer. For mixed-population validation, each strain was normalized to OD600 = 0.01 before equal-ratio mixing, and endpoint clones were genotyped by colony PCR using NaKfiA-F (ATGATAATAGCTAATATGGCAACATTTCCCG) and NaKfiA-R (GTGGTGGTGGTGGTGGTGTT), followed by Sanger sequencing. In this context, CRP-assisted denotes plasmid-based reinforcement of the *Pgnt* module because endogenous CRP was not sufficient to generate a robust plasmid-borne *Pgnt* reporter/selection output; it does not indicate that K5AC lacks CRP.

Section IV. Growth-coupled evolution of PmHS2 and structural interpretation of validated substitutions

Supplementary Table S2. PmHS2 mutant-library quality summary

Summary of mutation-rate and library-capacity information extracted from the vendor quality-control report for the randomized PmHS2 library.

| Parameter | Value |
| --- | --- |
| Library type | Randomized and degenerated PmHS2 library |
| Vector | pACYC_P34_PmHS2 |
| Host used for library cloning/electroporation | SS320 competent cells |
| Target mutation frequency | 5–8 mutations/kb |
| Observed mutation frequency | 6.4 mutations/kb |
| Library quality verification | Sanger sequencing of 22 random colonies |
| Estimated library capacity | ≥3.8 × 10^7 CFU |
| Vendor report date | 17 Sep 2023 |

Supplementary Figure S13. 3D trajectory plot of representative enriched sites.


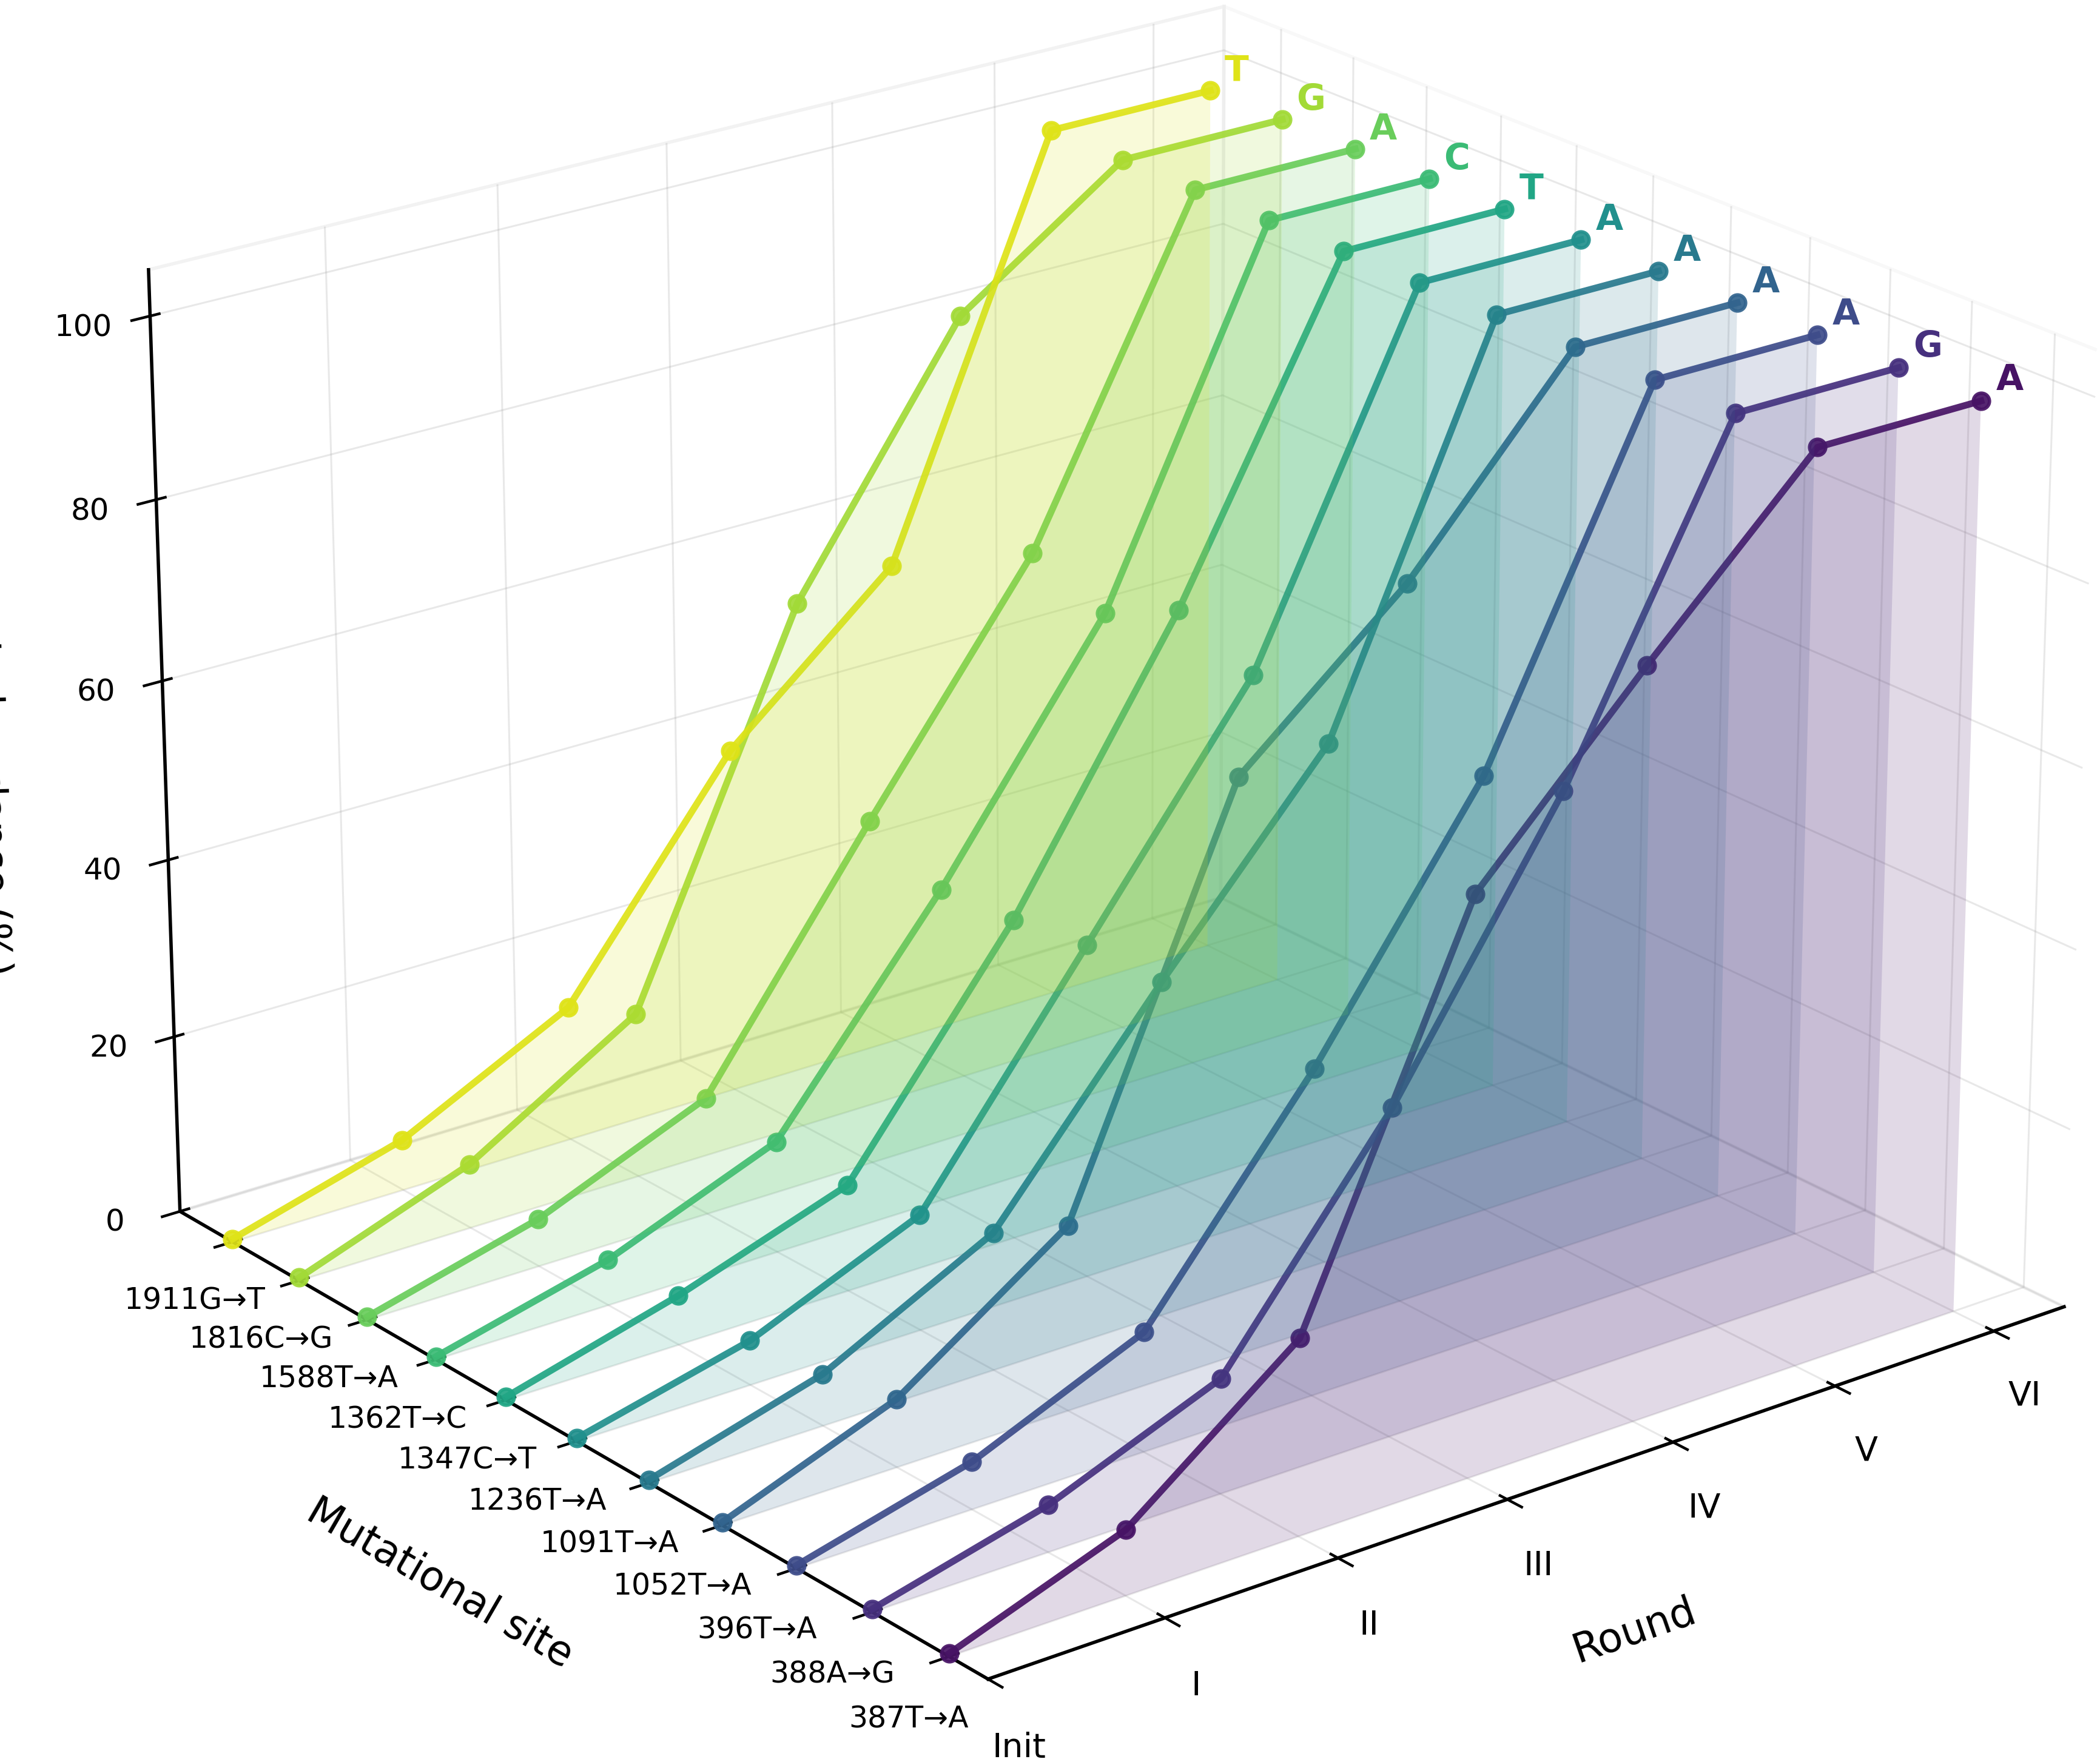


Trajectory plot of representative enriched nucleotide sites.

Supplementary Figure S14. Docking overview and structural mapping of validated PmHS2 substitutions.


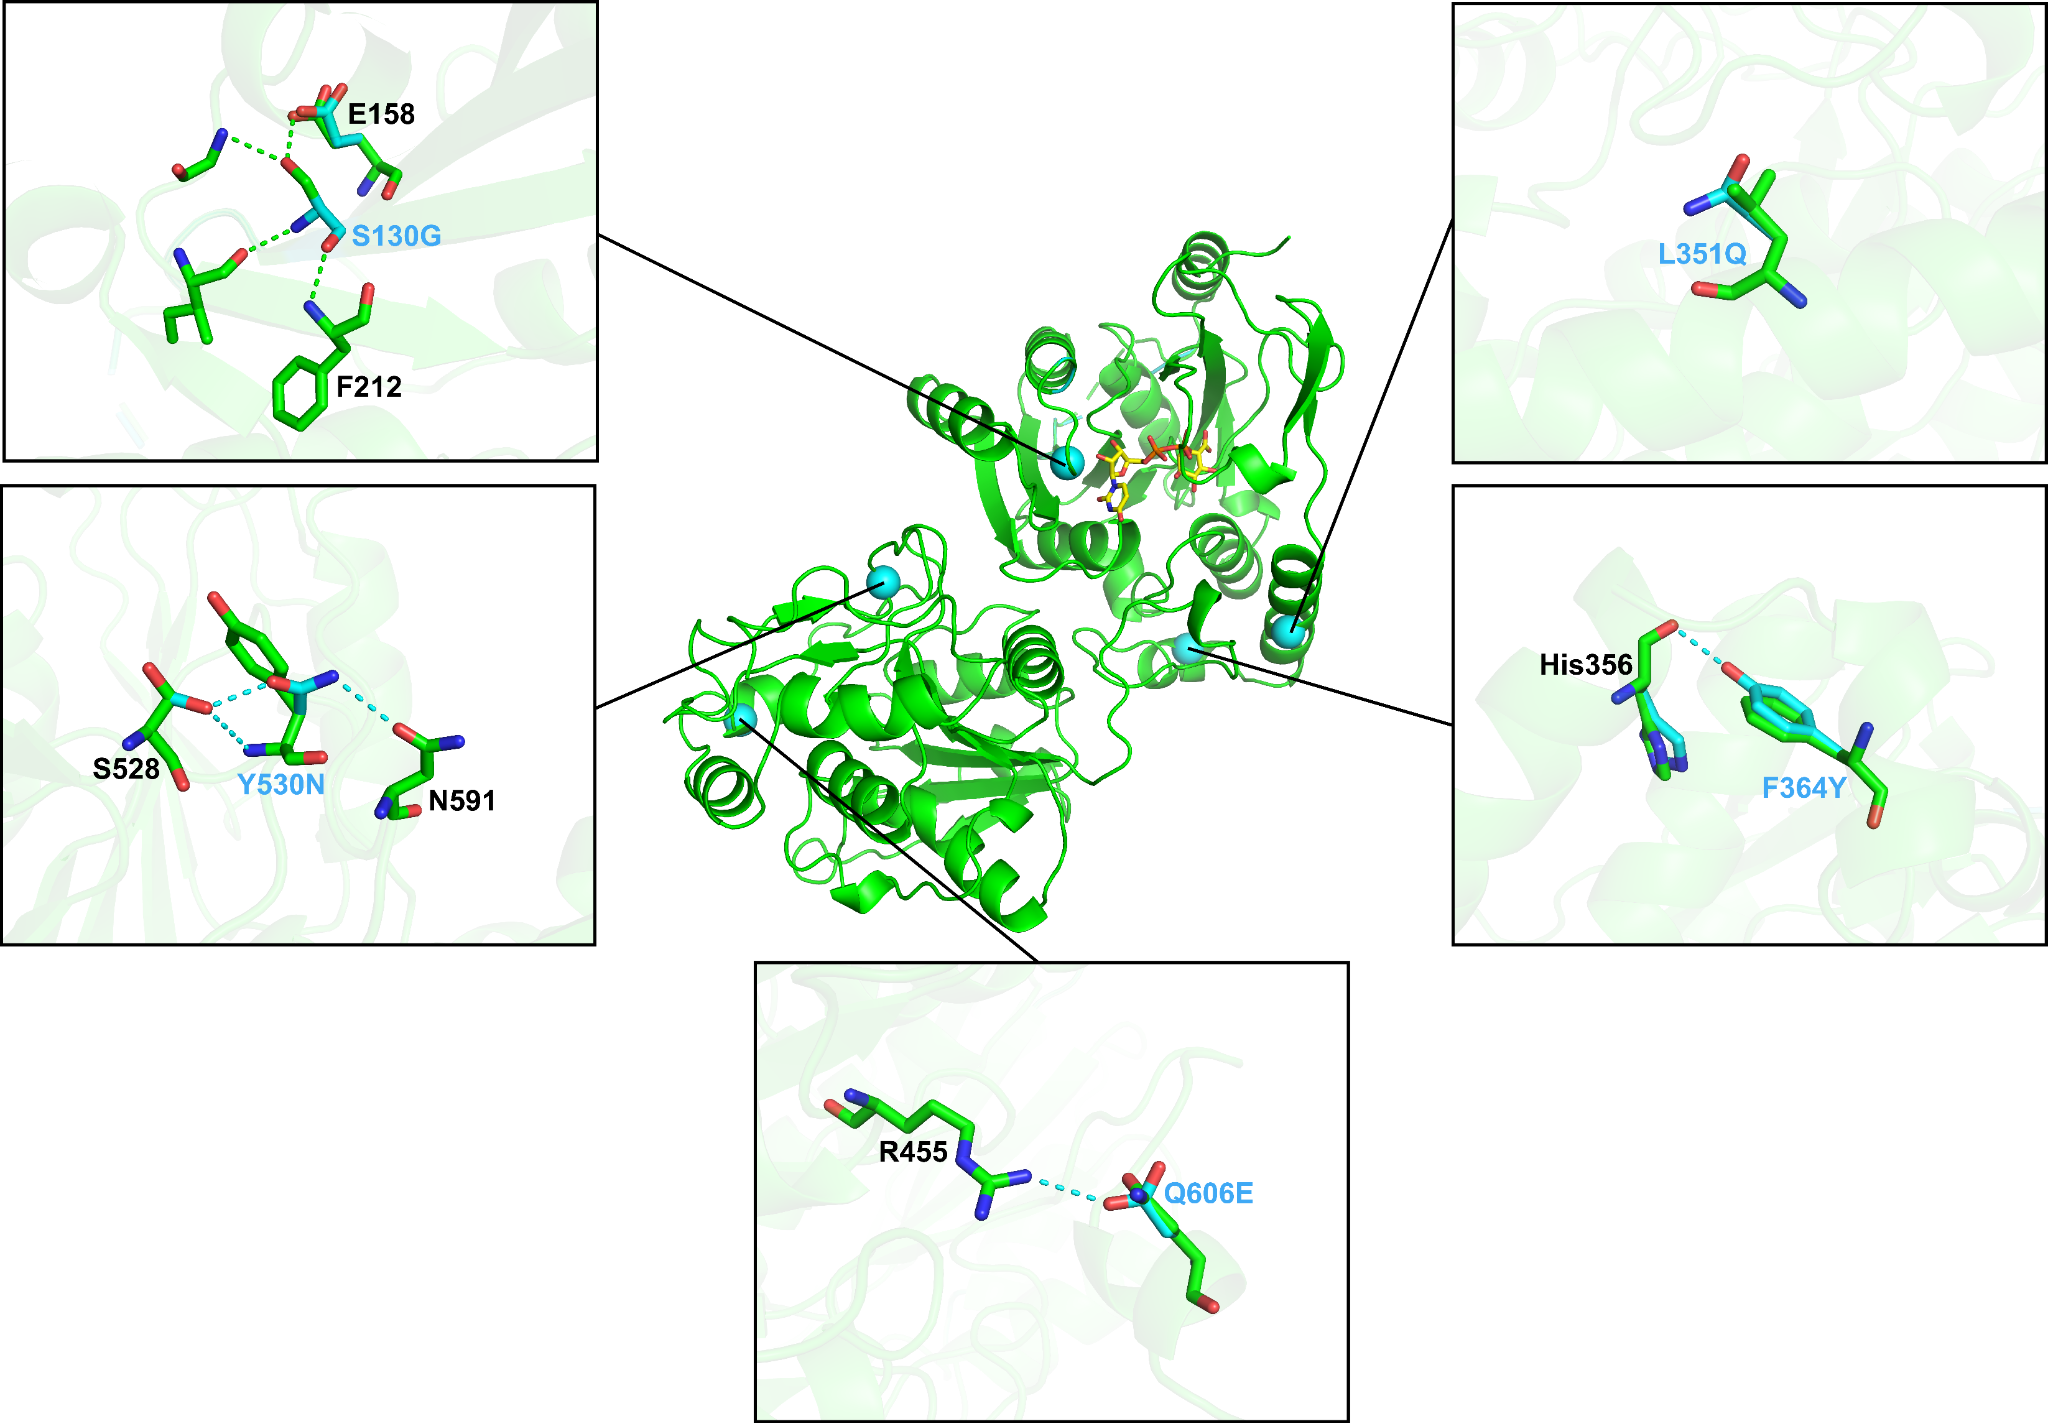


Docking overview for UDP-GlcA and UDP-GlcNAc with chain A of PDB 8VIW, with validated PmHS2 substitutions mapped onto the model. AutoDock Vina v1.2.7 parameters are provided in the Methods.

Supplementary Figure S15. Local structural view of S130G.


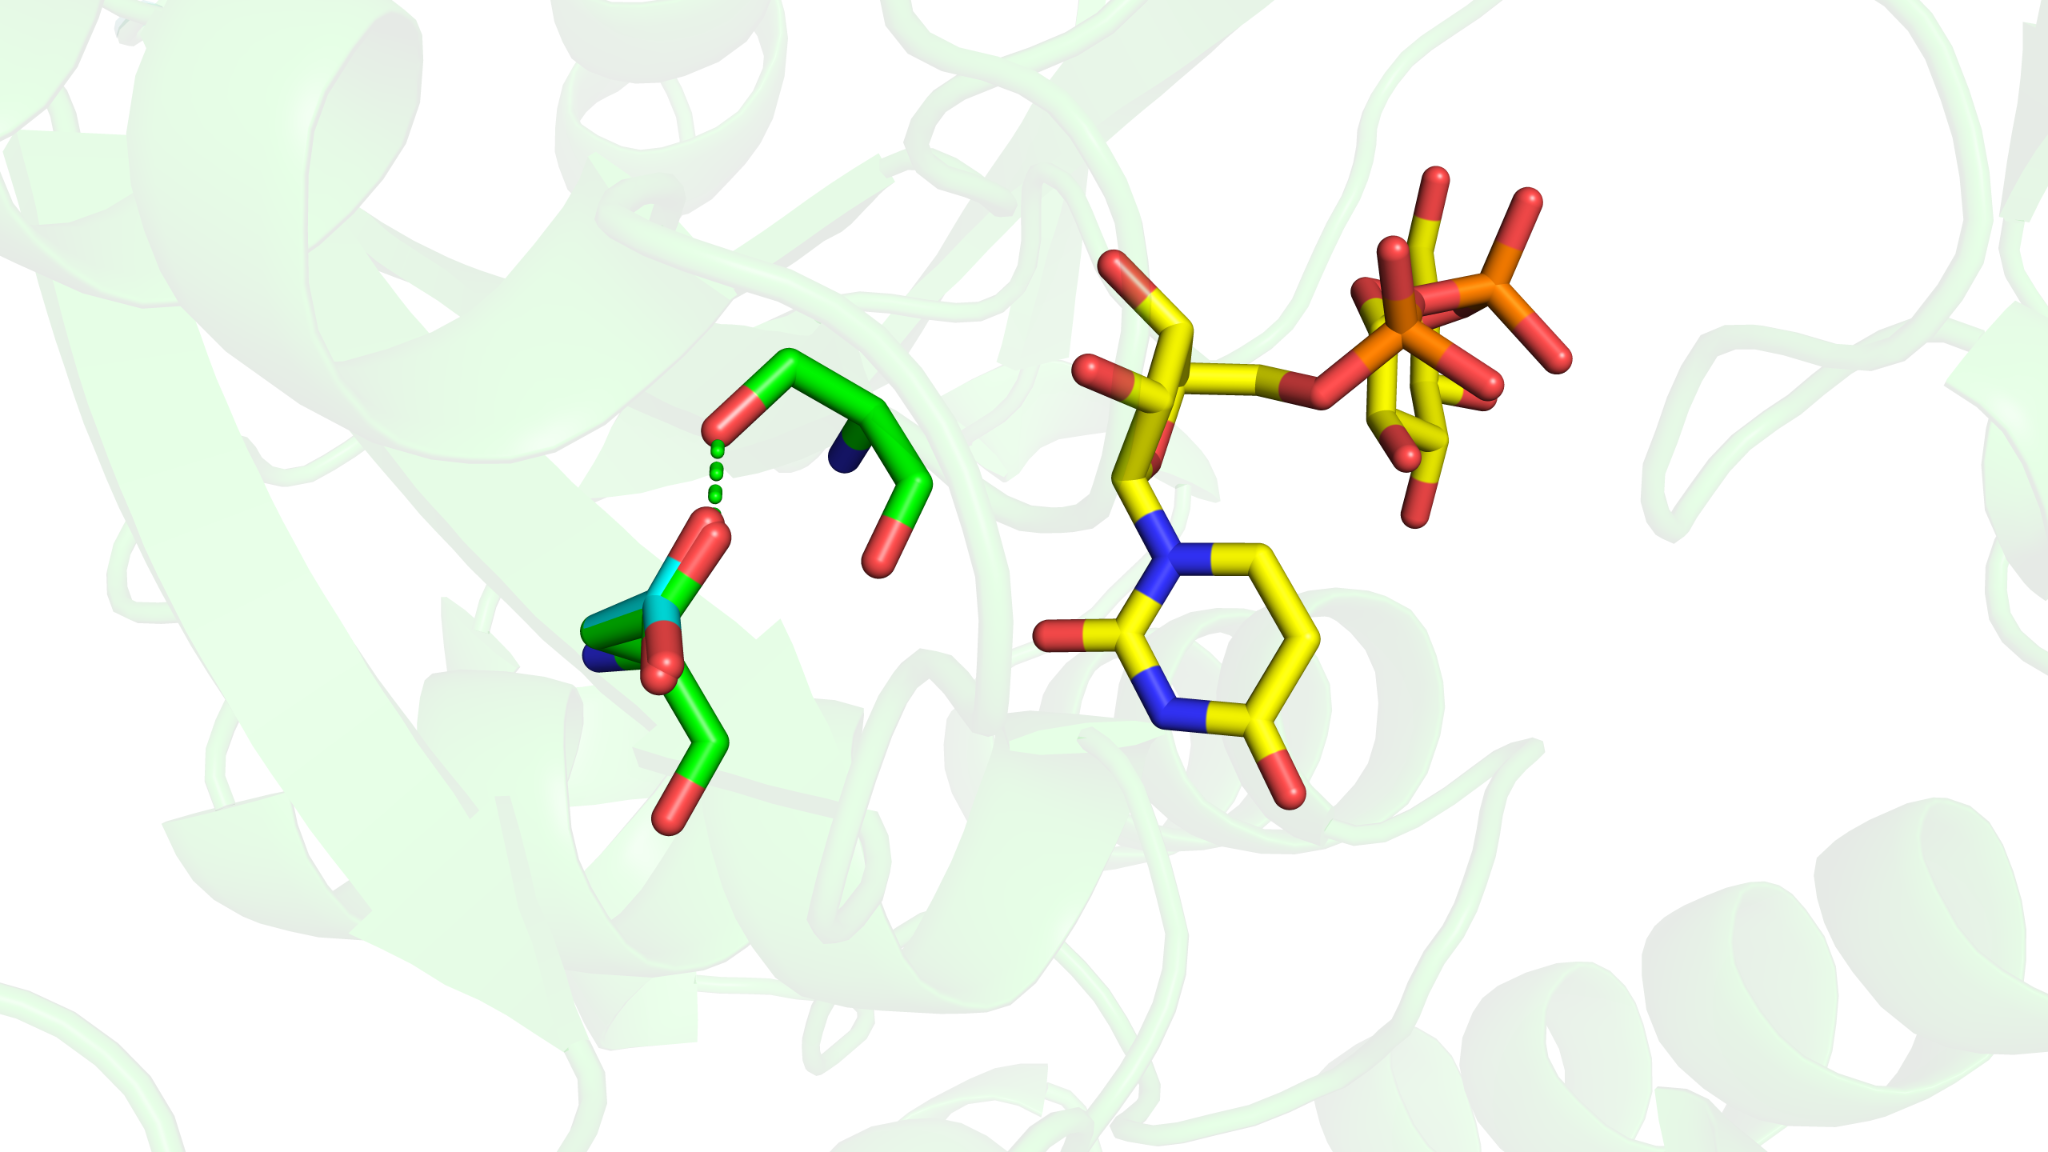


Local structural view of the S130G substitution. FoldX output and local contacts are shown in the panel/source data.

Supplementary Figure S16. Local structural view of L351Q.


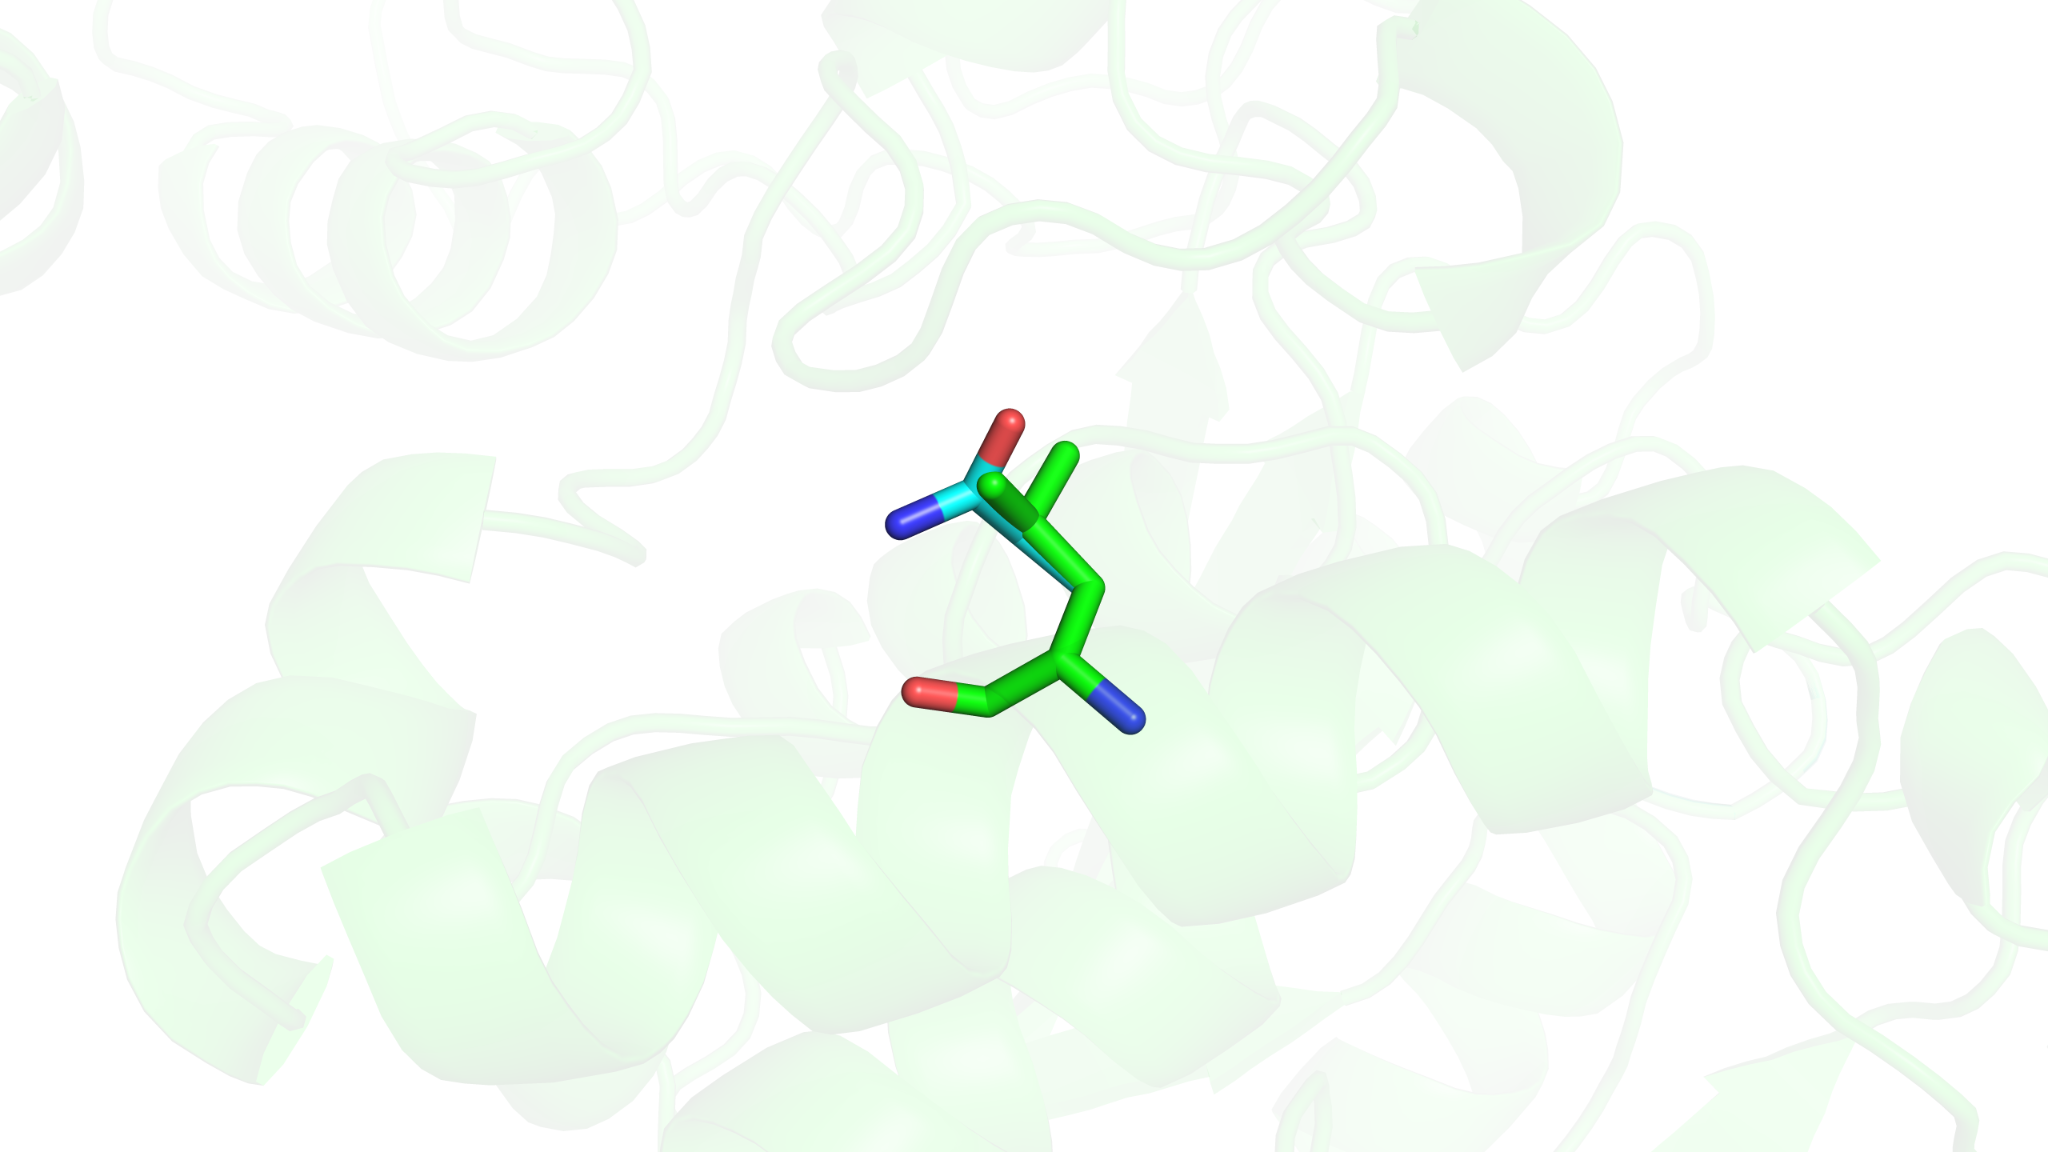


Local structural view of the L351Q substitution. FoldX output and local contacts are shown in the panel/source data.

Supplementary Figure S17. Local structural view of F364Y.


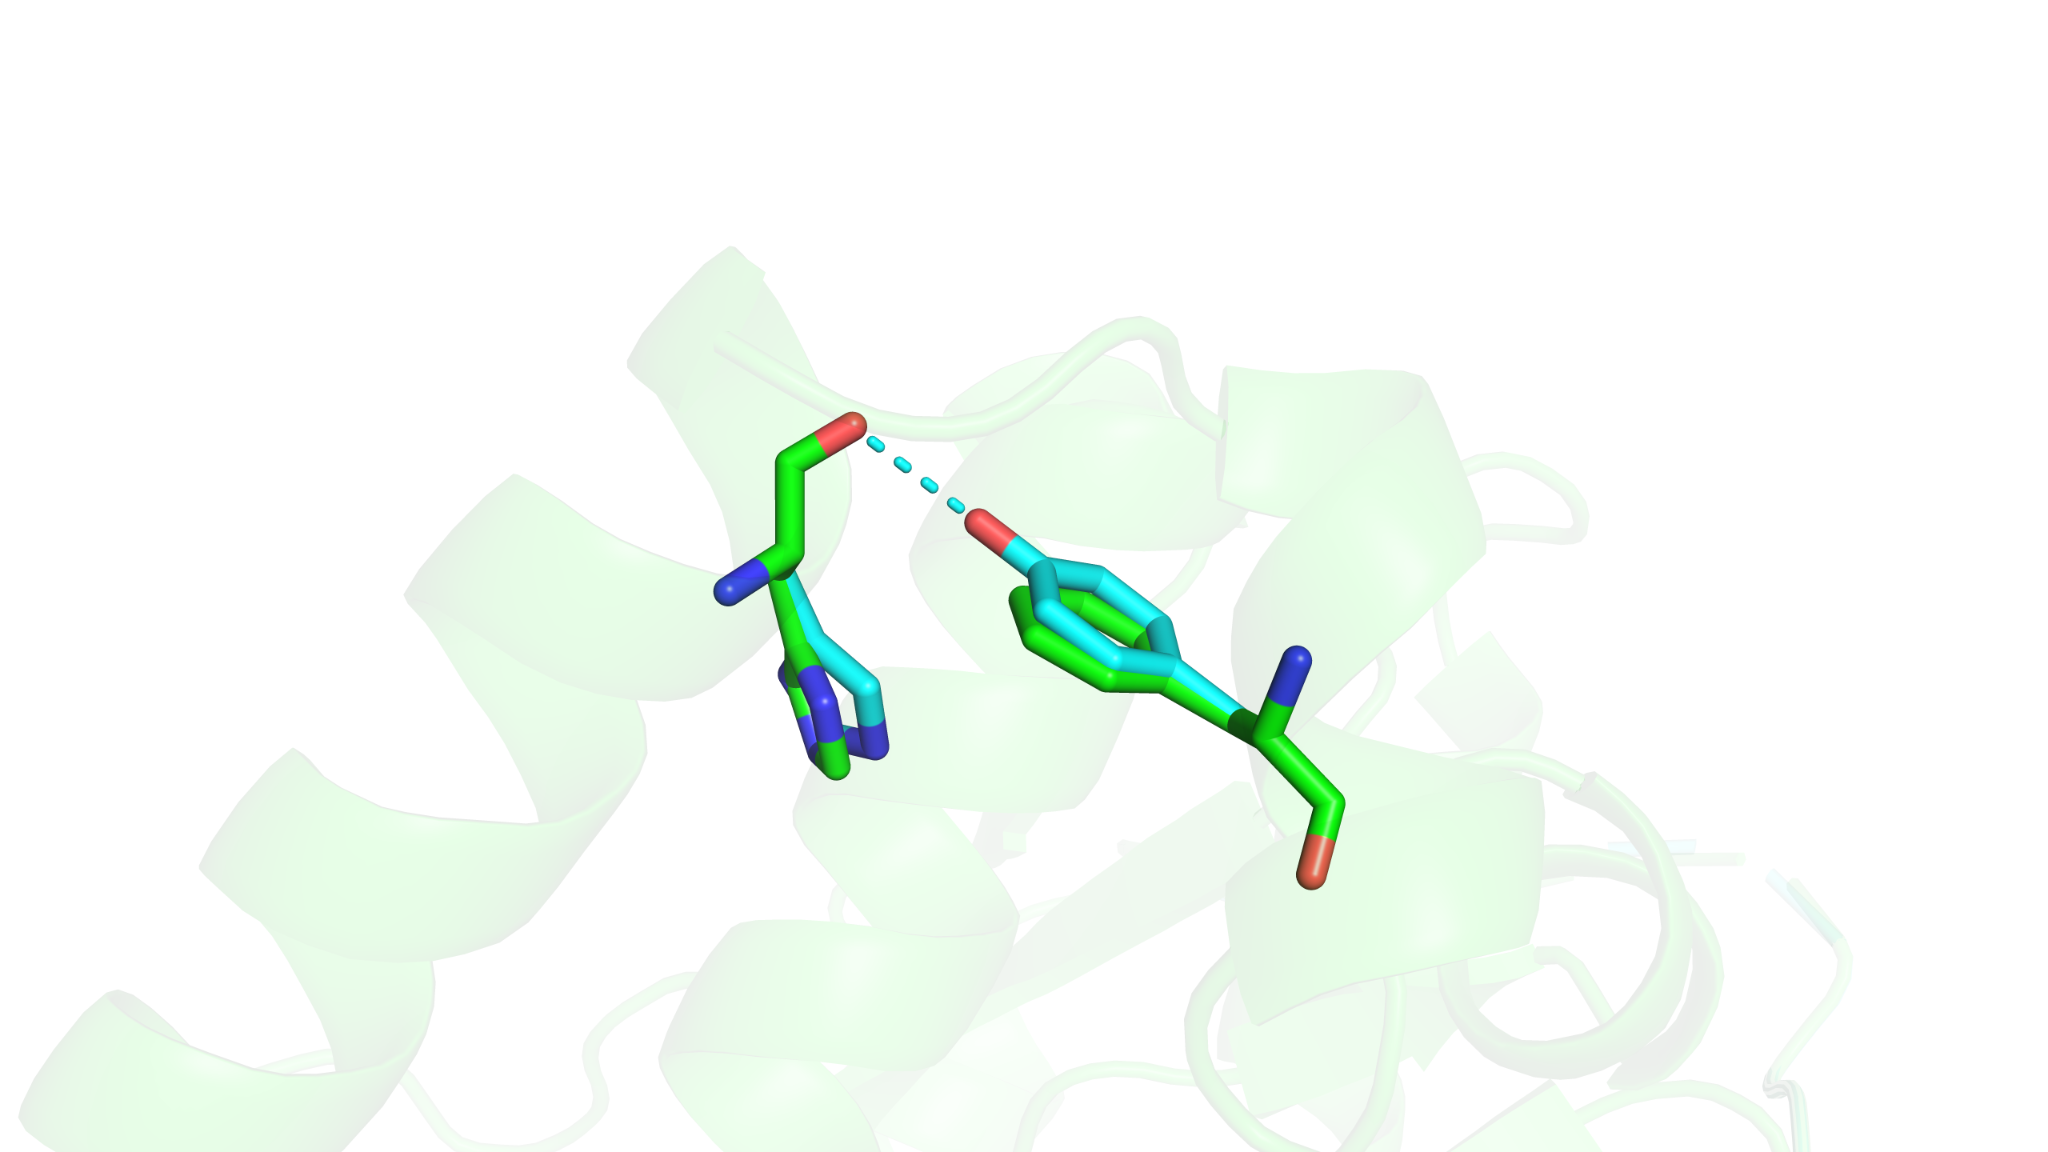


Local structural view of the F364Y substitution. FoldX output and local contacts are shown in the panel/source data.

Supplementary Figure S18. Local structural view of Y530N.


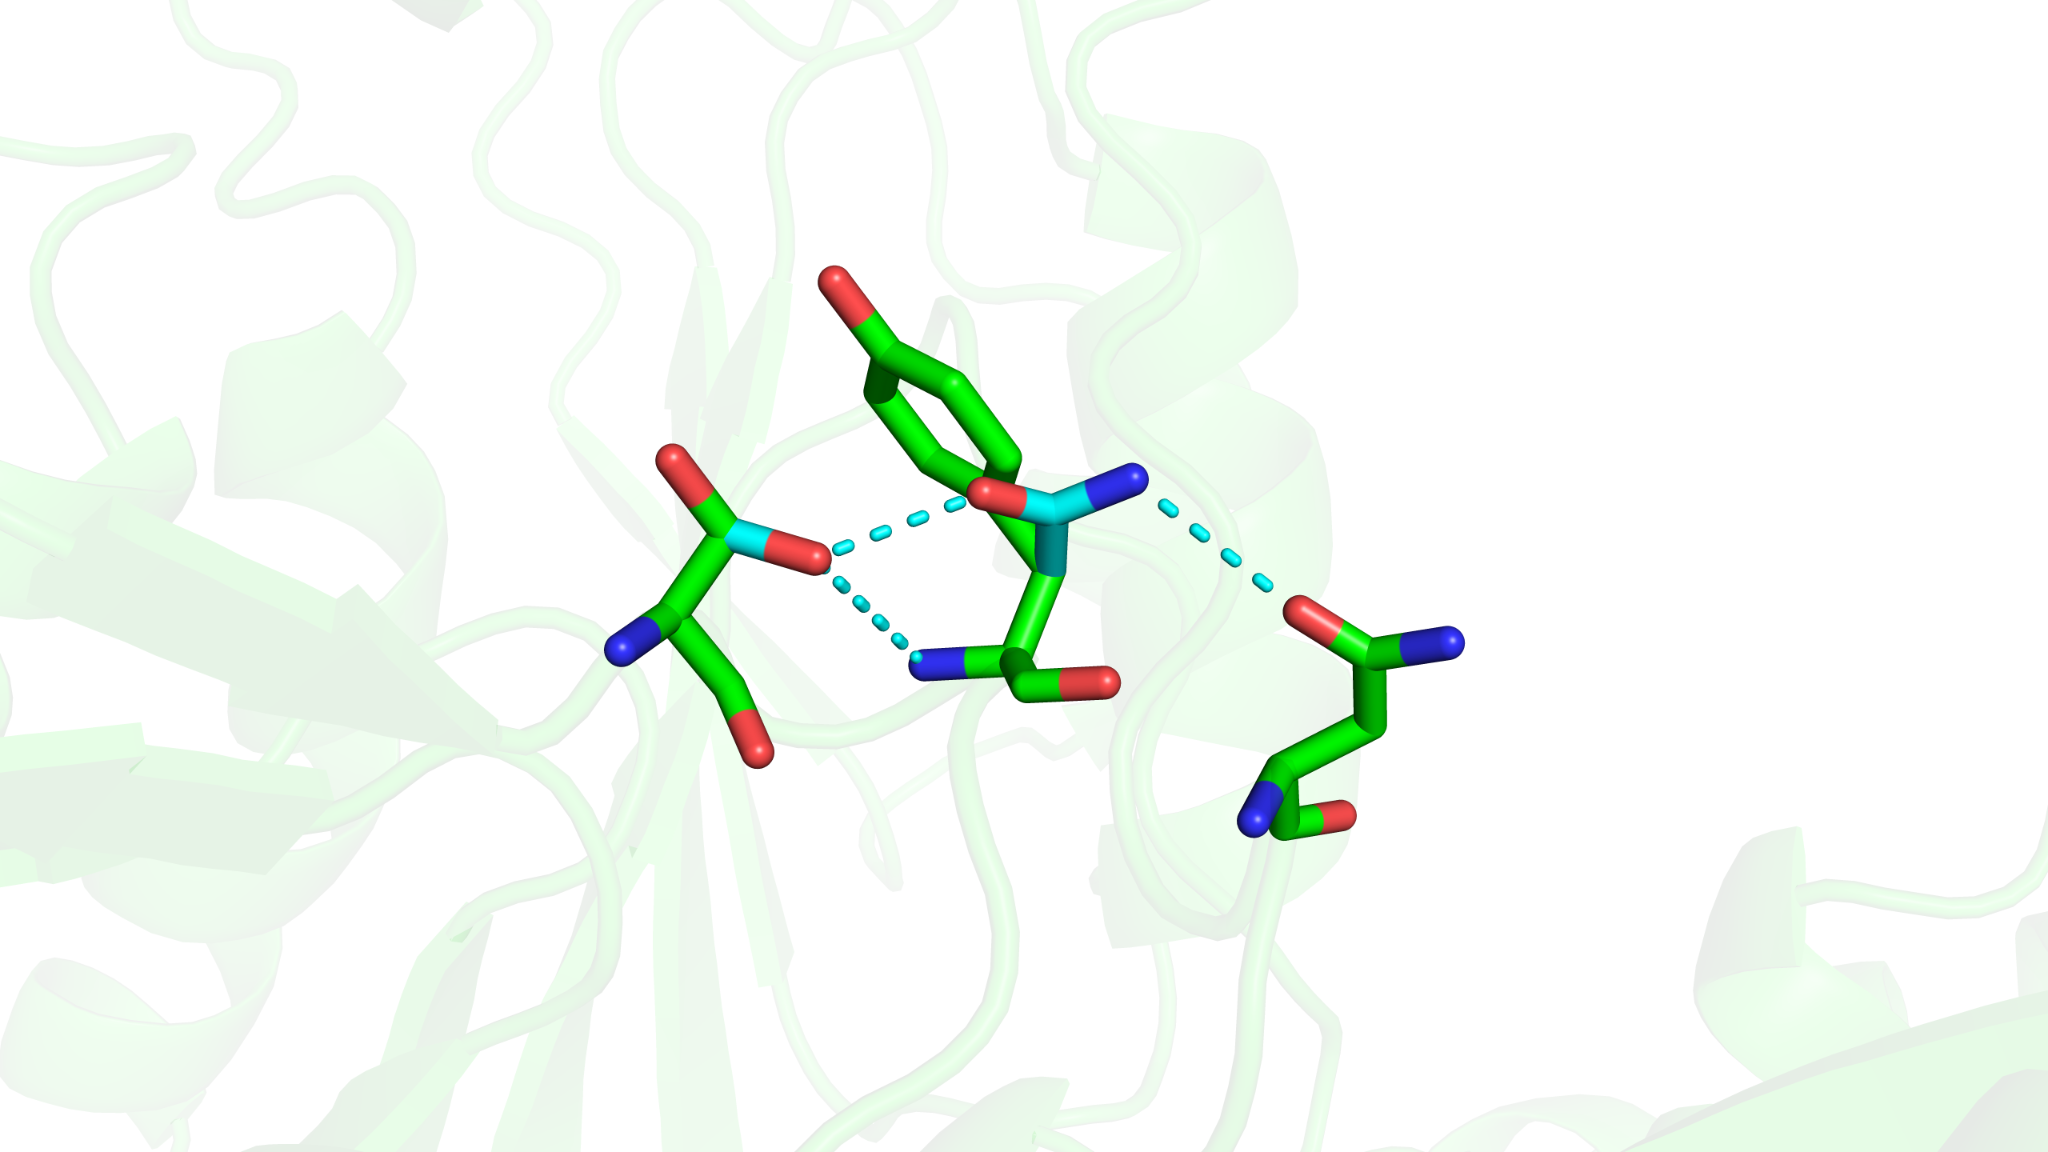


Local structural view of the Y530N substitution. FoldX output and local contacts are shown in the panel/source data.

Supplementary Figure S19. Local structural view of Q606E.


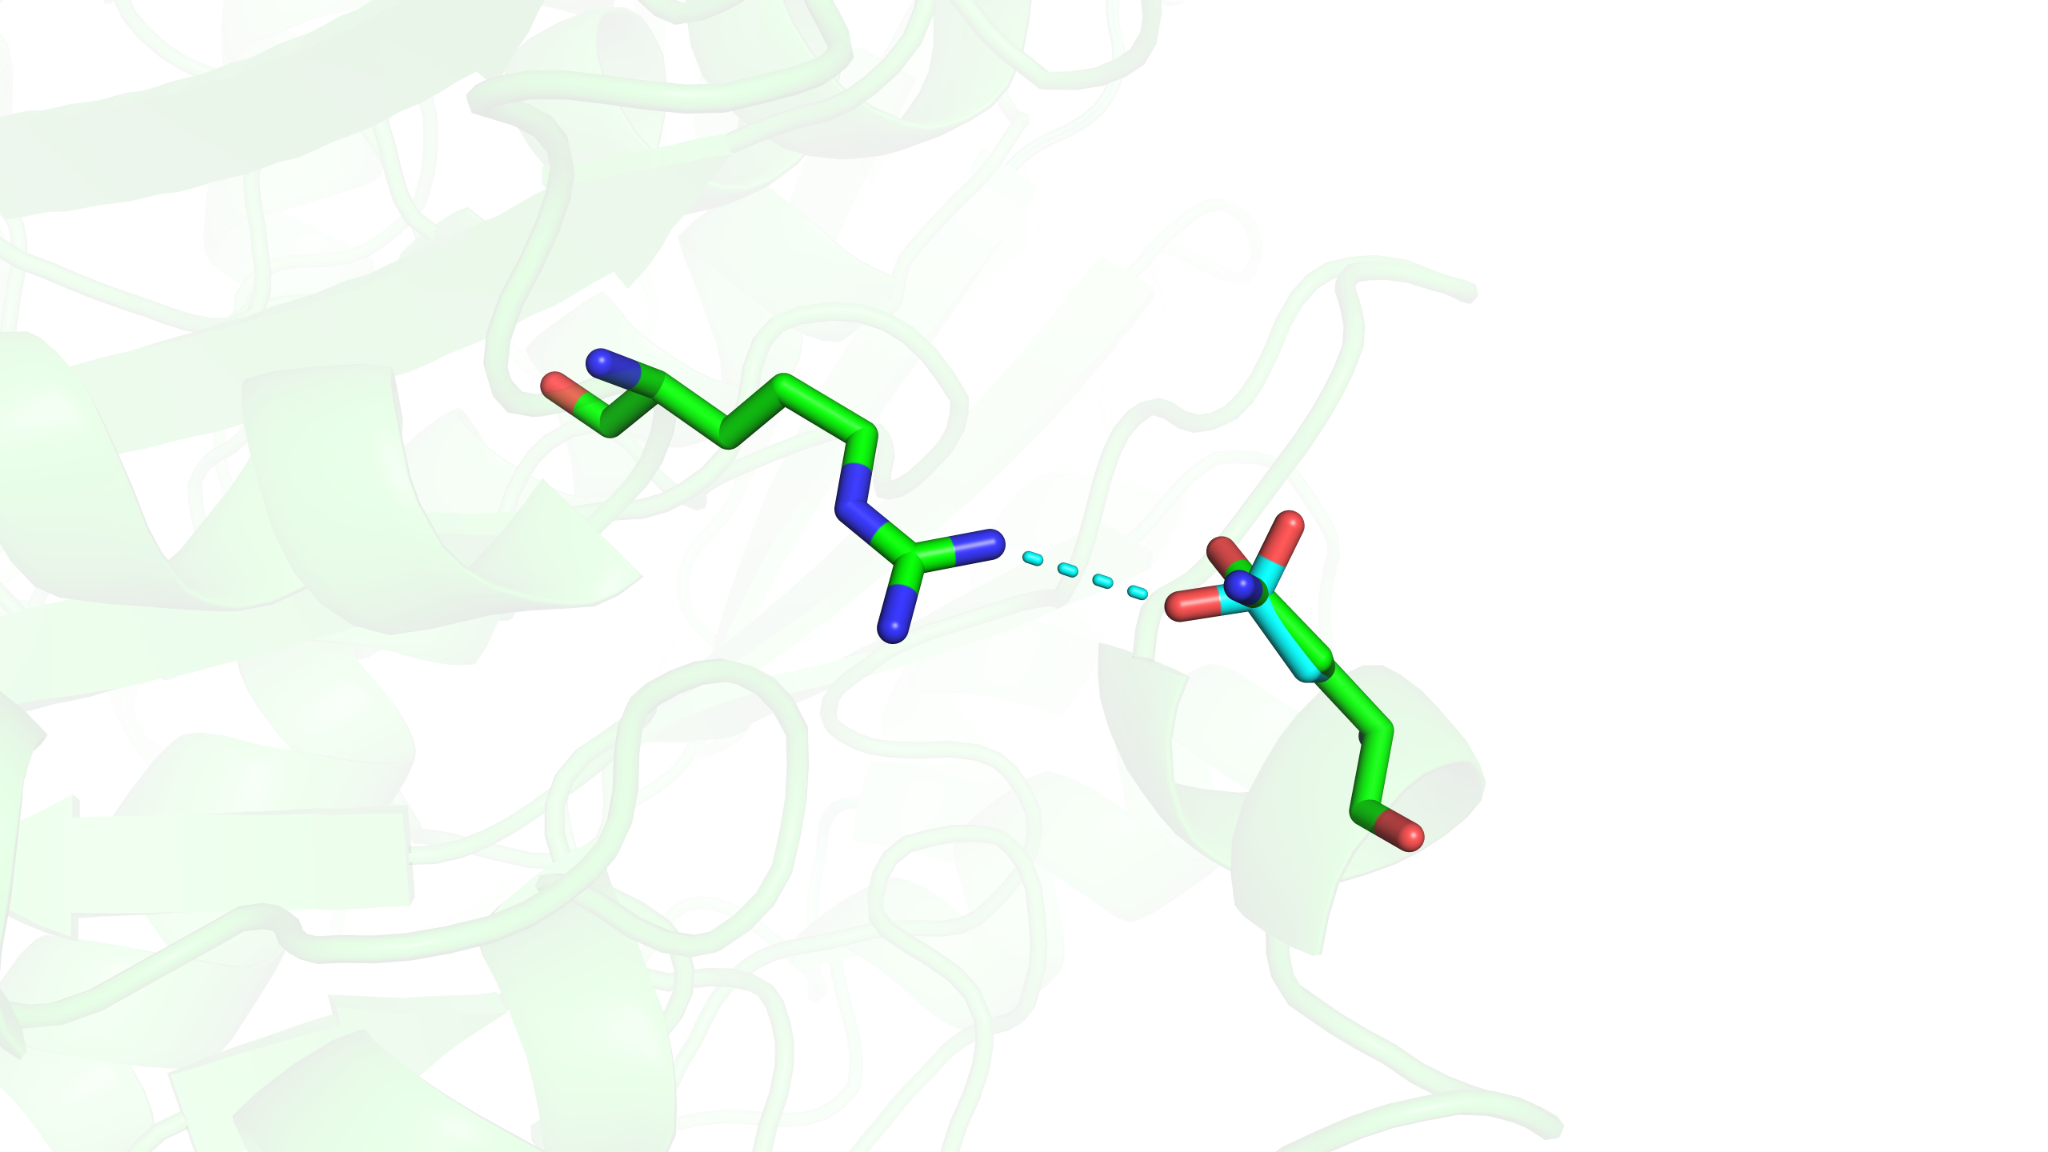


Local structural view of the Q606E substitution. FoldX output and local contacts are shown in the panel/source data.

Section V. *kfiA* repeat-enrichment outcomes and orthogonal validation

Supplementary Table S3. Mutation-site summary for enriched *kfiA* variants M1, M2, and M3

| **Sample** | **Level** | **Position(s)** | **Mutation call(s)** |
| --- | --- | --- | --- |
| **M1** | cDNA | 185, 228, 364, 432, 483, 549, 599, 618, 665, 715, 717 | c.185T>A, c.228A>C, c.364T>C, c.432A>T, c.483T>A, c.549A>T, c.599T>C, c.618A>T, c.665T>A, c.715T>G, c.717A>T |
| Protein | 62, 76, 122, 144, 161, 183, 200, 206, 222, 239 | p.V62E, p.V76V, p.S122P, p.T144T, p.D161E, p.I183I, p.M200T, p.T206T, p.I222N, p.*239D |
| **M2** | cDNA | 105, 108, 109, 110, 340, 410, 544, 712 | c.105T>A, c.108G>A, c.109T>A, c.110T>G, c.340A>C, c.410G>C, c.544A>G, c.712G>A |
| Protein | 35, 36, 37, 114, 137, 182, 238 | p.N35K, p.E36E, p.F37S, p.I114L, p.R137T, p.M182V, p.G238R |
| **M3** | cDNA | 90, 165, 179, 185, 310, 445, 506, 620 | c.90T>C, c.165A>T, c.179A>T, c.185T>A, c.310T>G, c.445C>T, c.506T>C, c.620T>A |
| Protein | 30, 55, 60, 62, 104, 149, 169, 207 | p.I30I, p.P55P, p.K60M, p.V62E, p.C104G, p.L149F, p.V169A, p.F207Y |

Tabulated cDNA-level and protein-level mutations identified in the enriched *kfiA* variants M1, M2, and M3 isolated after repeat enrichment.

Supplementary Figure S20. Schematic of the NADH-coupled assay.


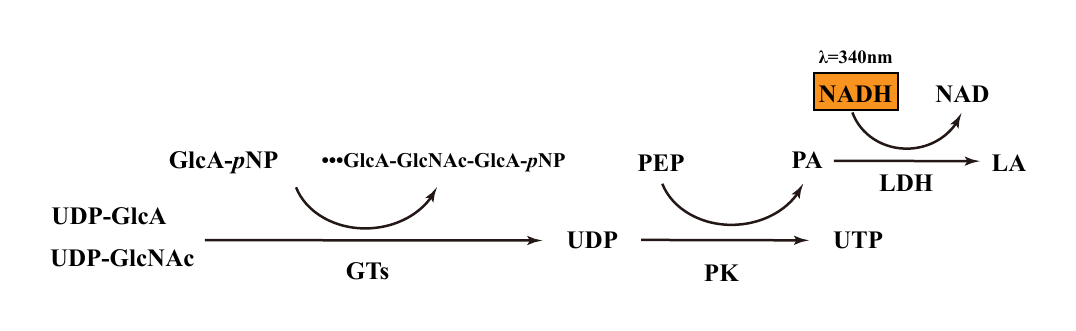


Schematic of the NADH-coupled assay used for coupled-output quantification in Fig. 5D.

Supplementary Figure S21. Raw NADH-coupled kinetic traces for WT and enriched *kfiA* variants.


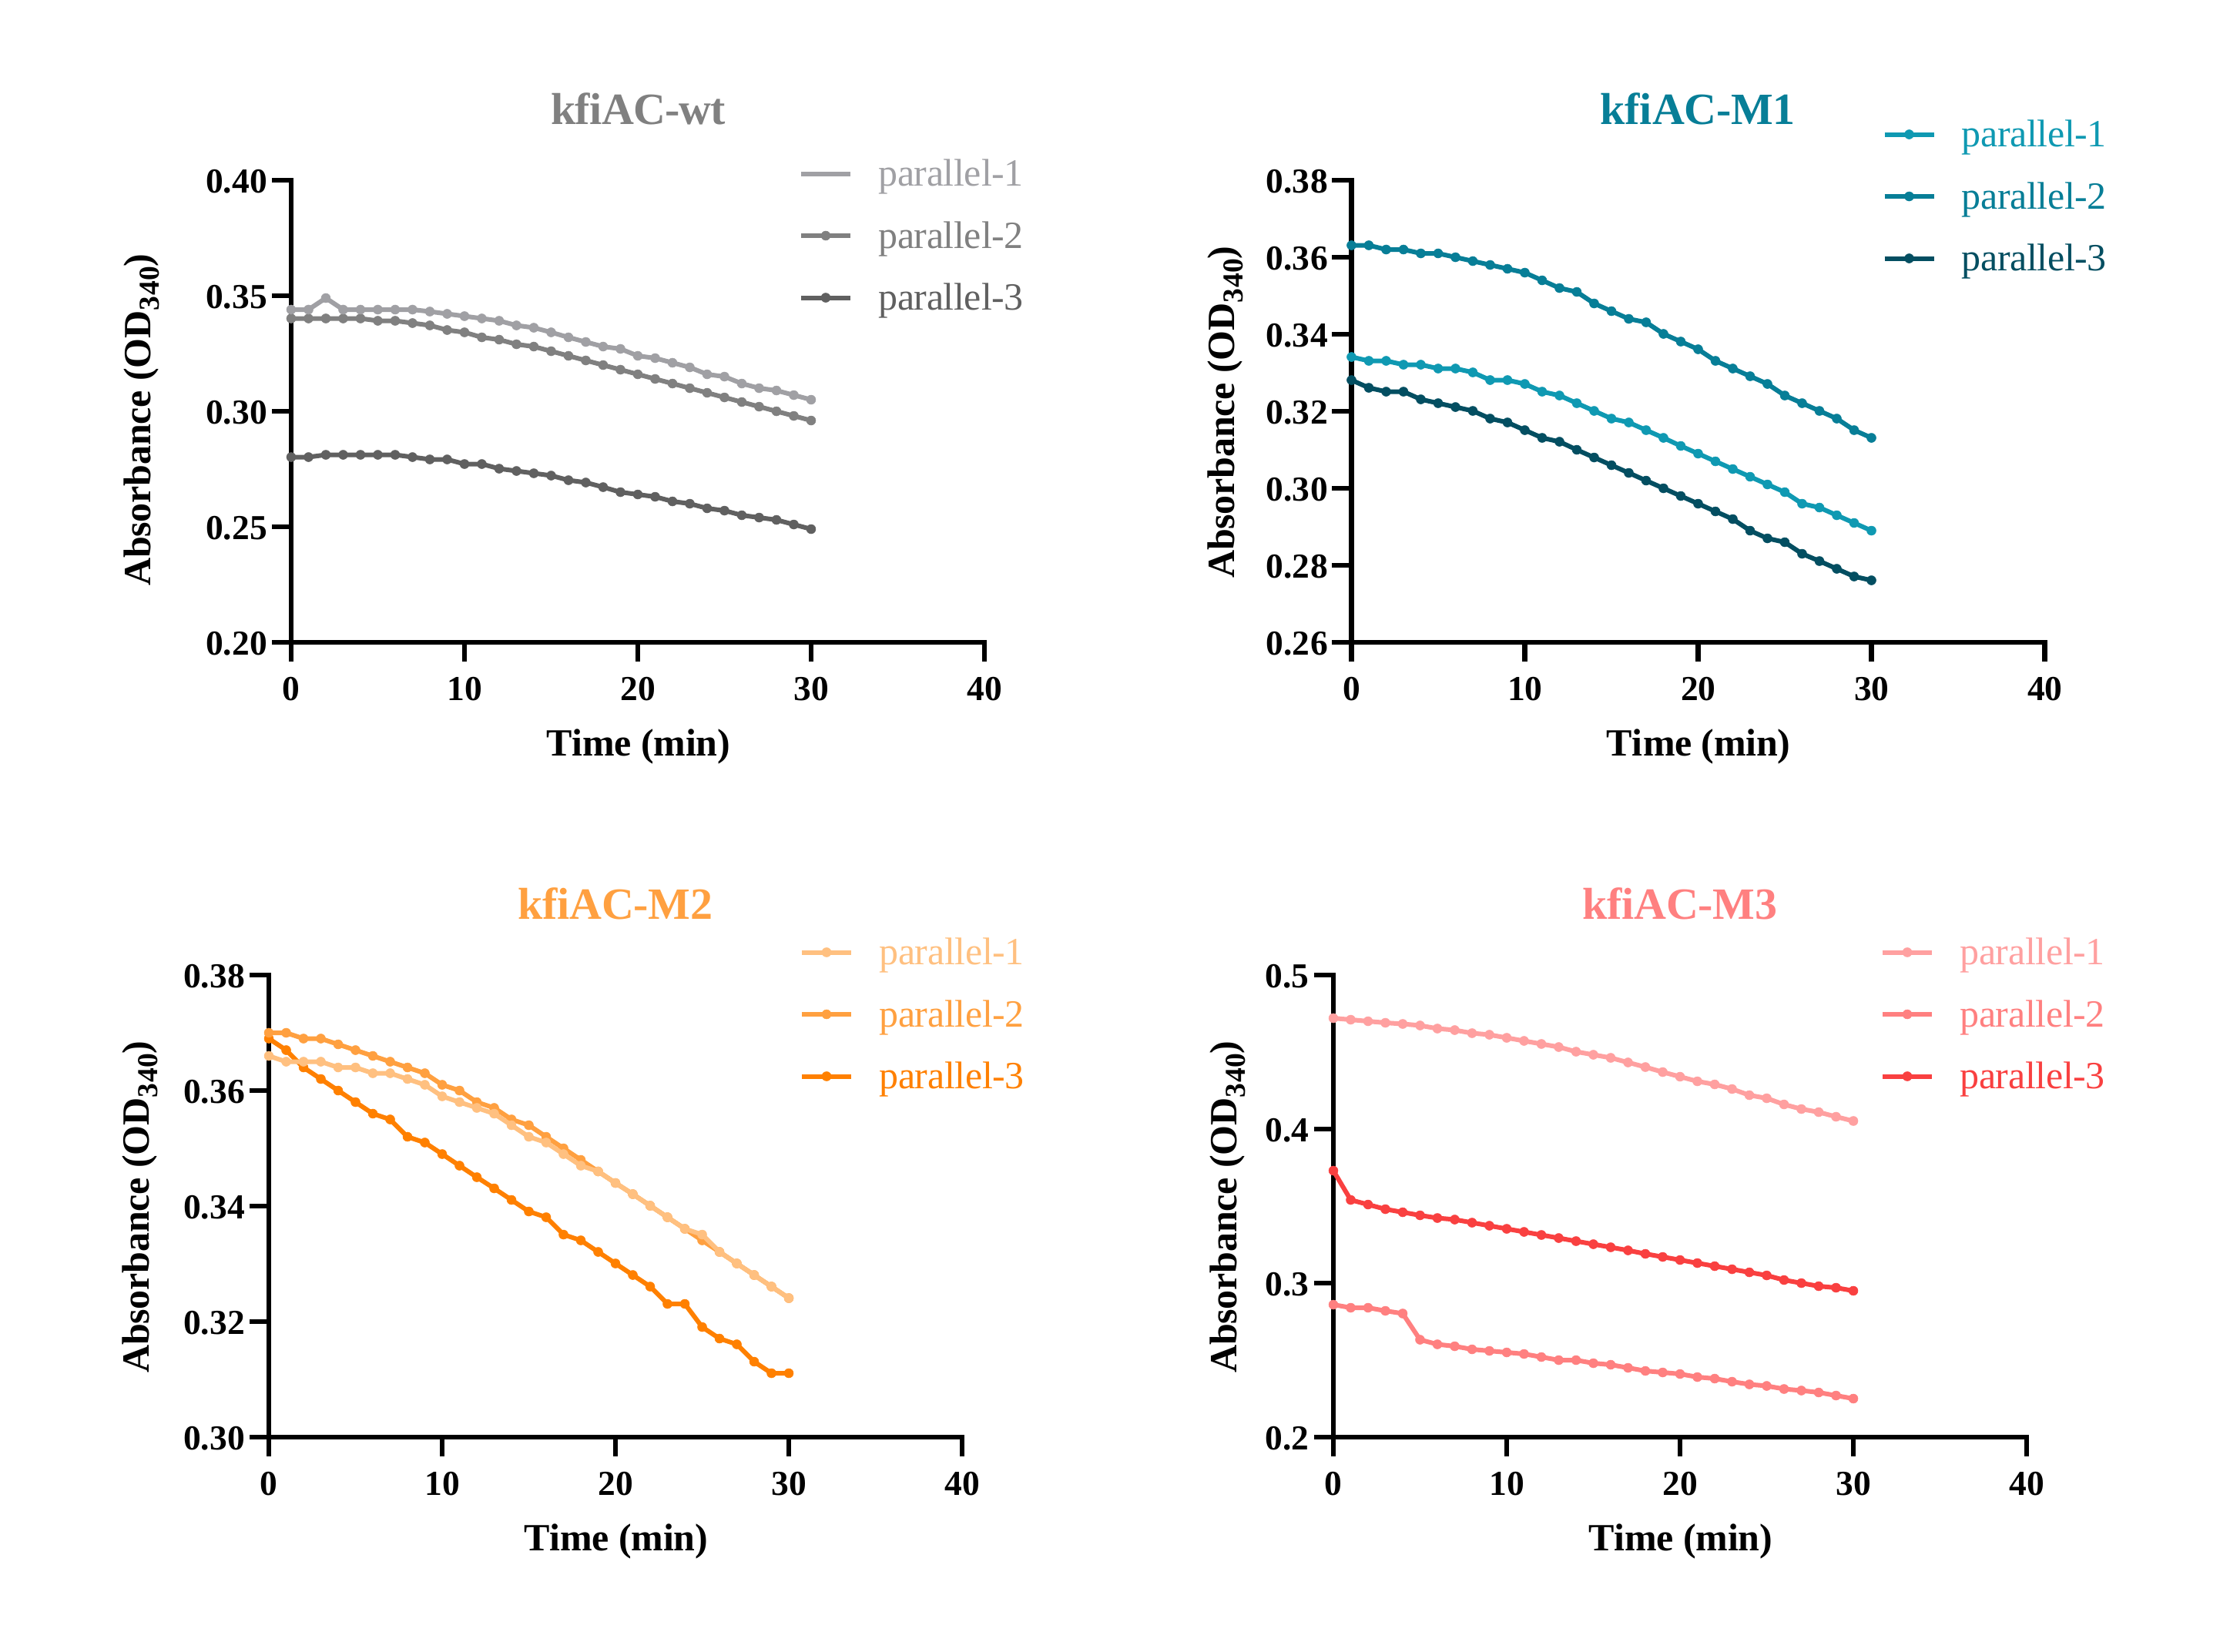


Raw A340 time-course traces used for slope extraction in Fig. 5D. Thin lines indicate biological replicates; thick lines indicate group means.

Section VI. Transcriptomic comparison between K5-WGE and K5

Supplementary Figure S22. K5-WGE gene saturation.


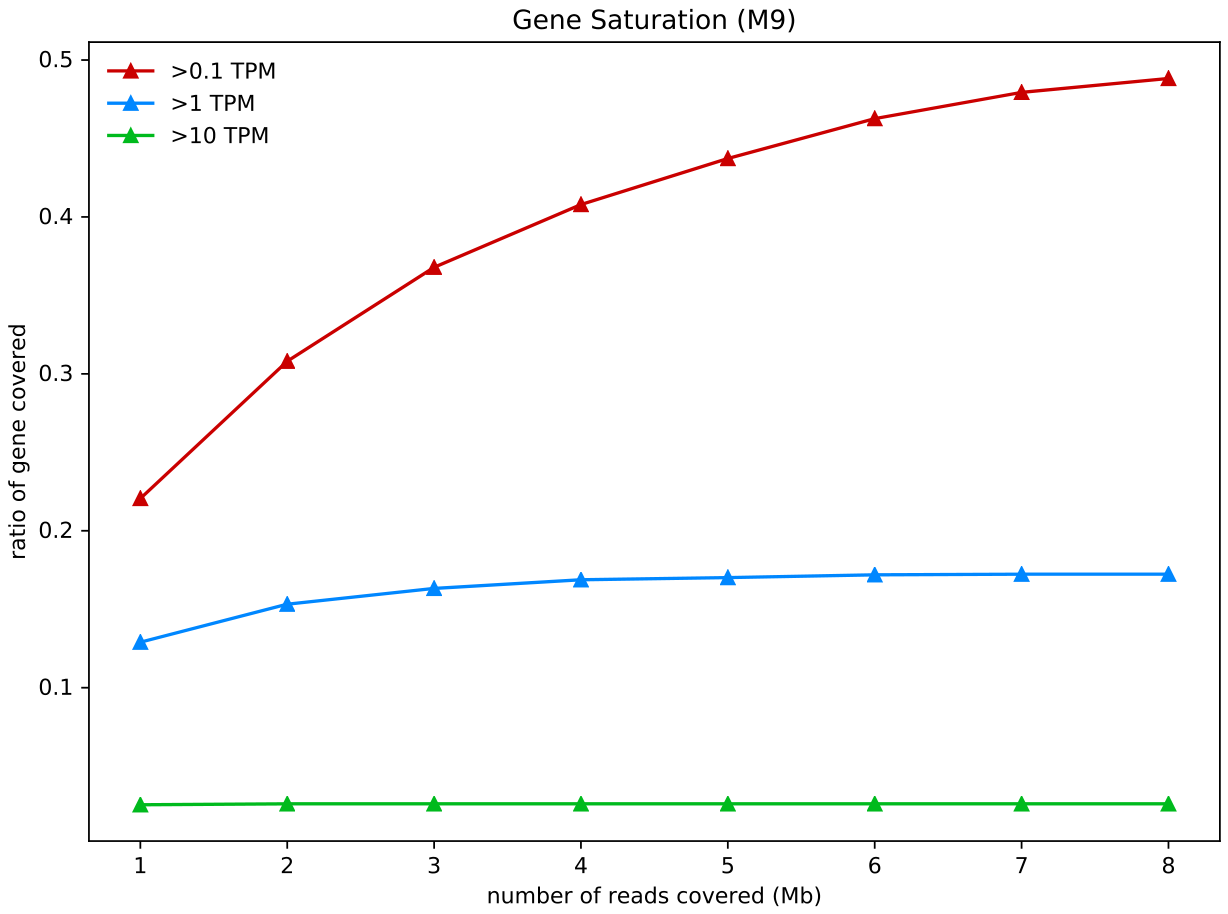


Gene-saturation plot for K5-WGE.

Supplementary Figure S23. K5 gene saturation.


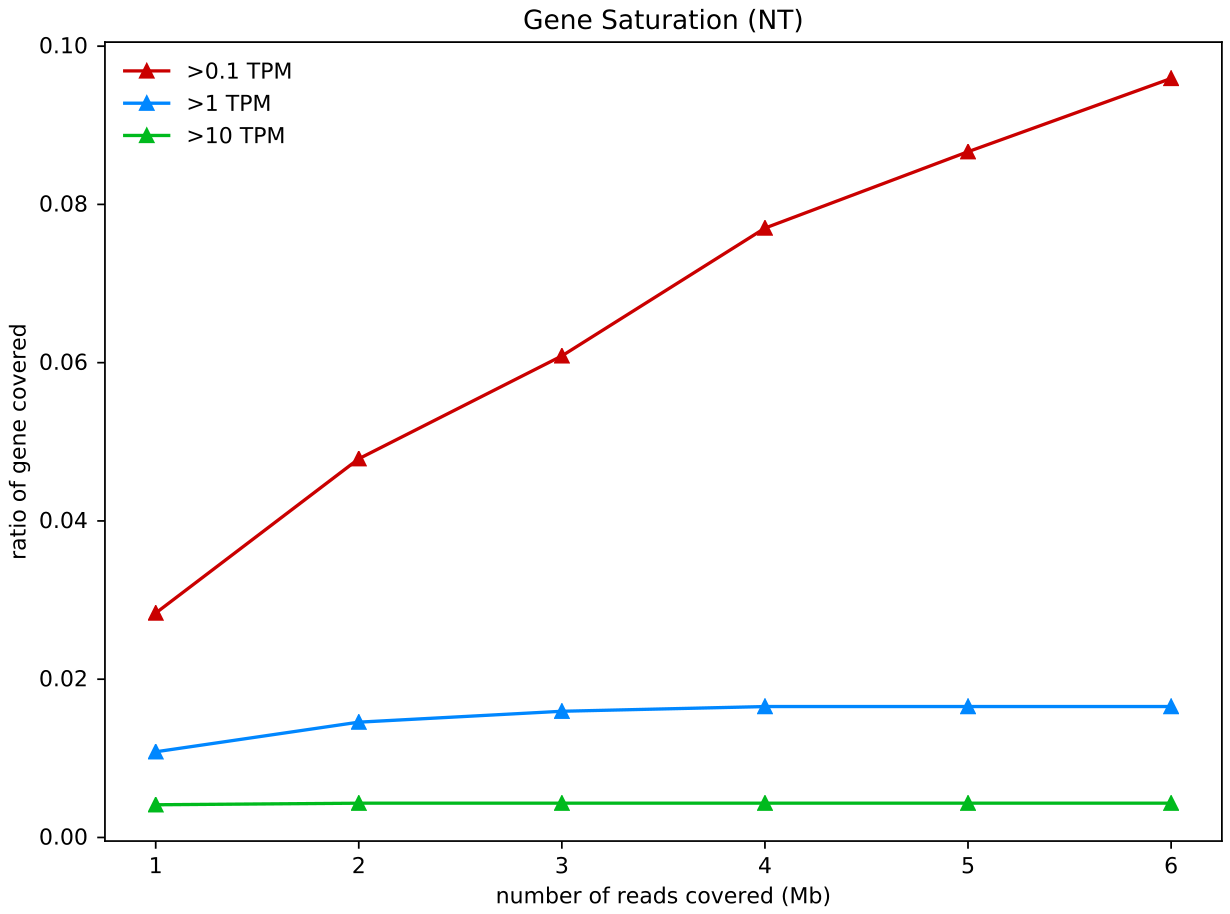


Gene-saturation plot for K5.

Supplementary Figure S24. K5-WGE versus K5 MA plot.


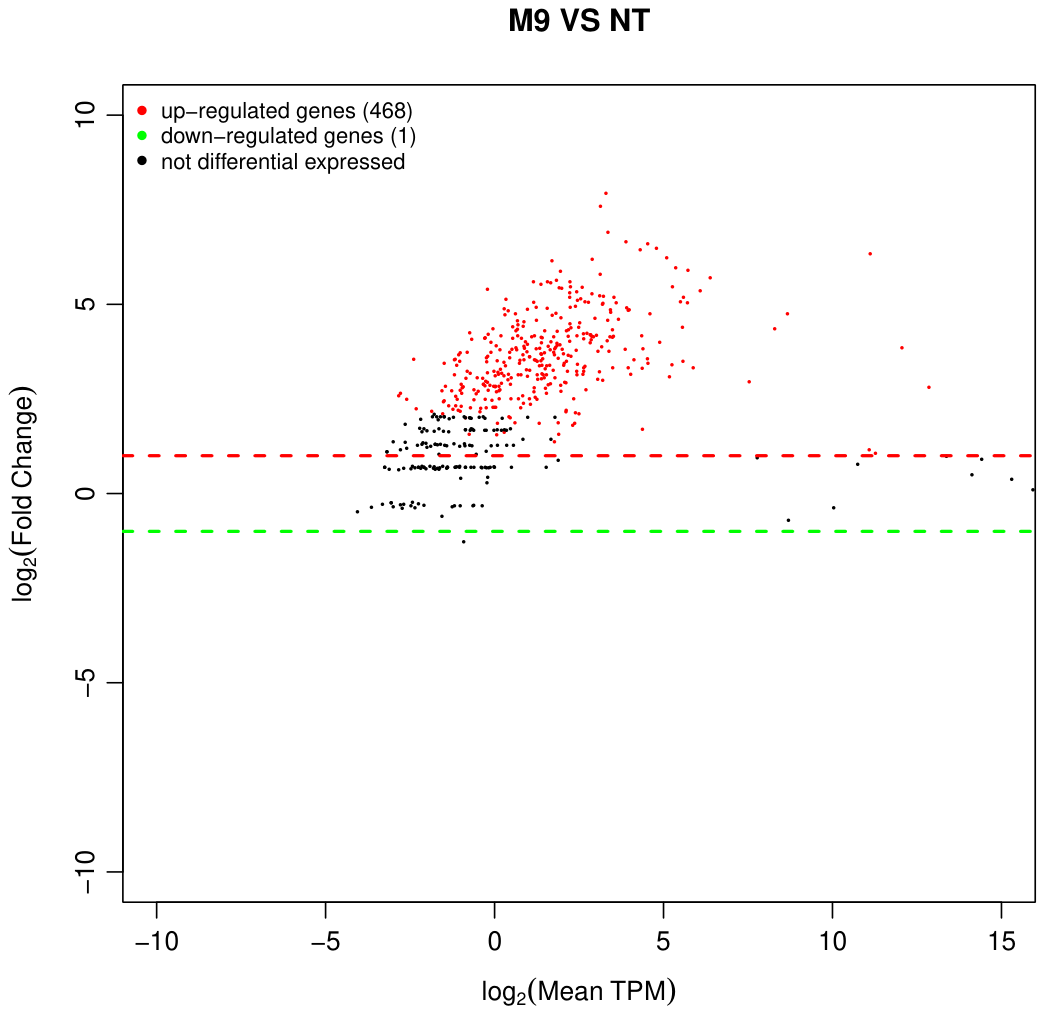


MA plot for K5-WGE versus K5.

Supplementary Figure S25. K5-WGE versus K5 GO enrichment support.


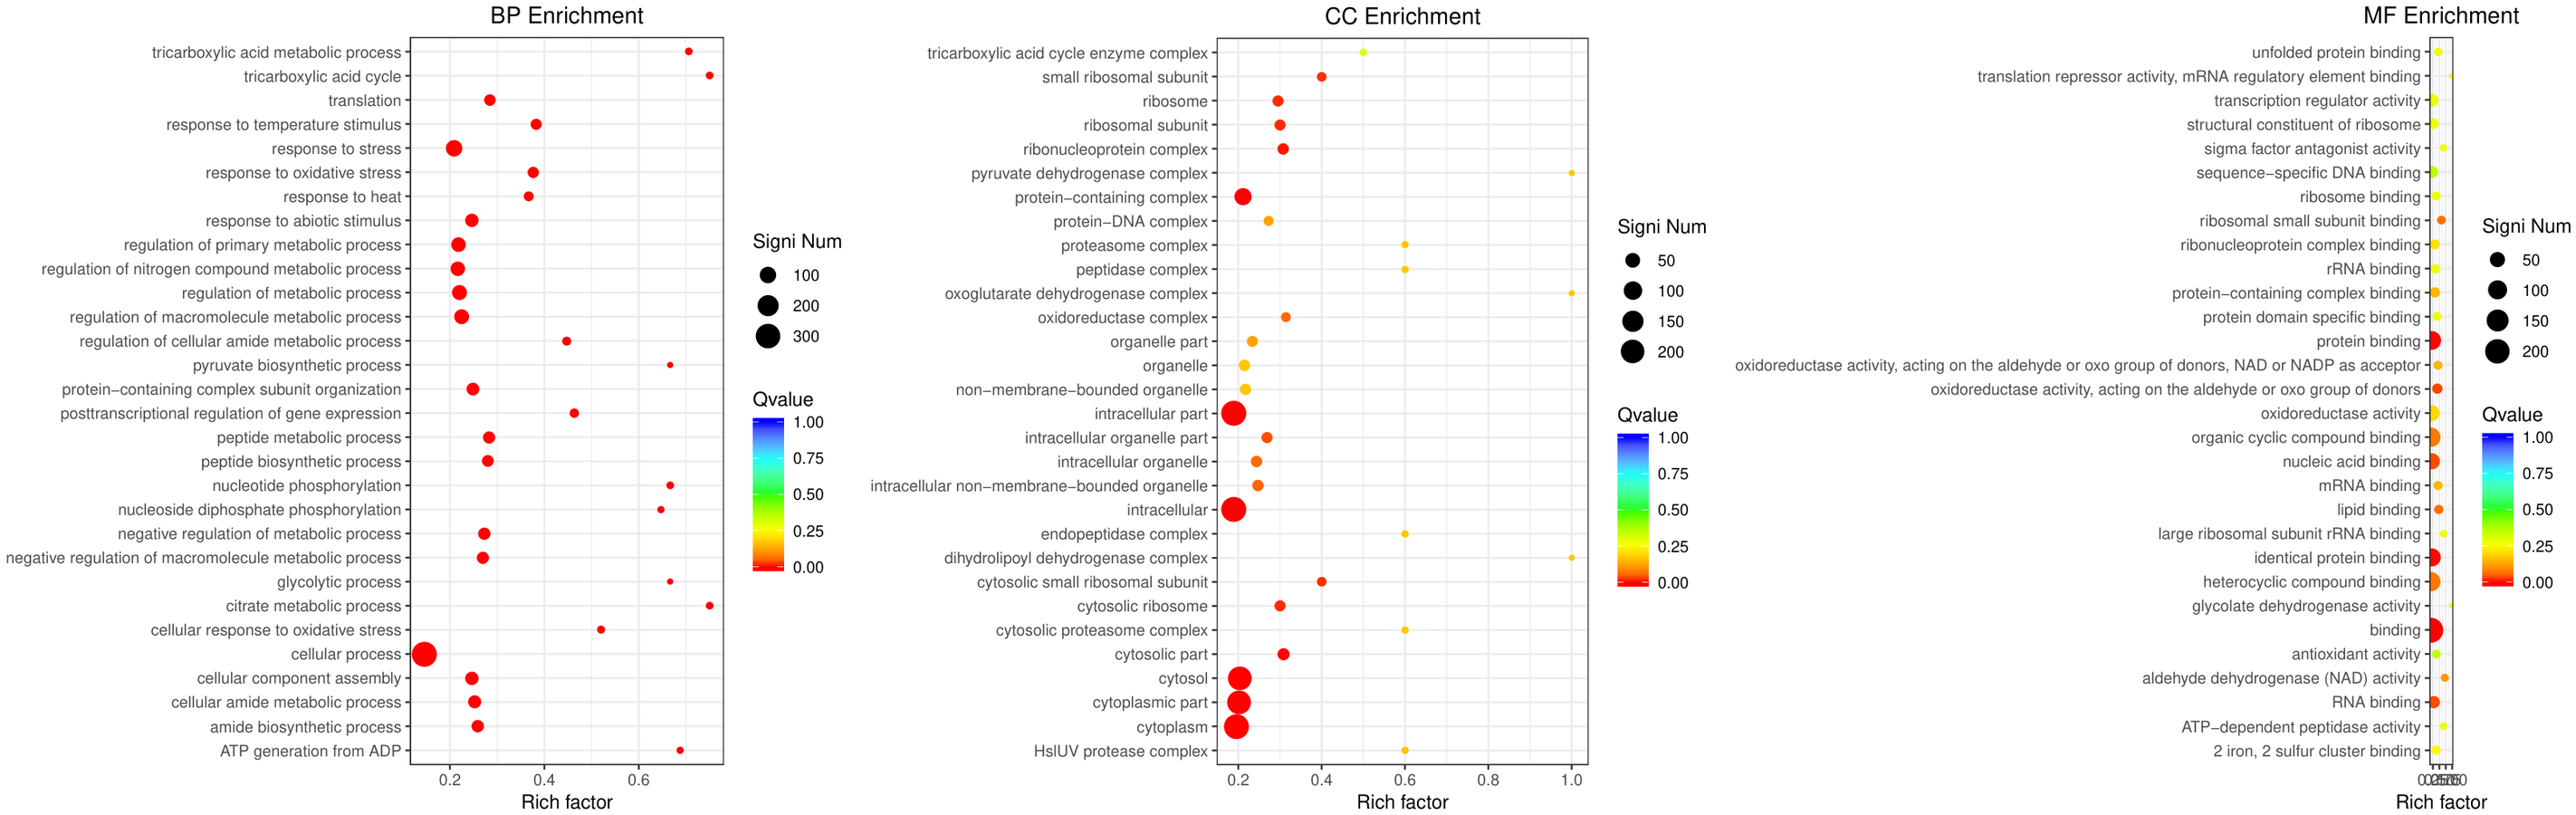


GO enrichment summary for K5-WGE versus K5.

Supplementary Table S4. Sample definitions and naming conventions used across datasets

| Item | Definition |
| --- | --- |
| K1 | K5 |
| A1 | K5A |
| Section I transcriptome | Stationary phase, OD600 = 2.10; no biological replicates |
| M9 | K5-WGE |
| NT | K5 |
| Section VI transcriptome | Stationary phase, OD600 = 2.1; no biological replicates |
| Candidate 6 | YihW |
| Section IV mutation name | S130G |

Section VII. Strains and plasmids used in this study

To improve reproducibility and nomenclature consistency, Supplementary Tables S5 and S6 summarize the principal strains and plasmids used in this study. These tables also reflect the revised platform-building logic used in Figure 3: construction of the clean K5AC chassis, Pgnt-only dual-plasmid benchmarking with pNG and pACYC-NaKfiA/*kfiC*, CRP-assisted fluorescence/growth selection with pNTG-CRP, and mixed-population validation under tetracycline pressure. Here, CRP-assisted selection refers to matching Pgnt with additional CRP supplied from the biosensor plasmid in the otherwise CRP-positive K5AC chassis.

Supplementary Table S5. Strains used in this study

| Strain | Relevant genotype / carried construct(s) | Description and experimental use | Source |
| --- | --- | --- | --- |
| K5 | *Escherichia coli* K5 | Parental heparosan-producing strain used as the wild-type reference for pathway characterization, transcriptomic comparison, and selection-circuit evaluation. | This study |
| K5A | *E. coli* K5 Δ*kfiA* | *kfiA*-deficient chassis generated by CRISPR/Cas9-mediated genome editing; used to define the heparosan-deficient state and to evaluate reporter performance. | This study |
| K5A/*kfiA* | K5A carrying pACYC_P34_*kfiA* | *K5A strain carrying pACYC_P34_kfiA, used to restore kfiA expression and support validation experiments.* | This study |
| K5-WGE | Whole-genome-evolved *E. coli* K5 derivative | Population isolated after coupling the Pgnt-CRP circuit to continuous genome-wide mutagenesis; used to assess host-adaptive outcomes and boundary conditions of the selection strategy. | This study |
| BL21(DE3) | *Escherichia coli* BL21(DE3) | Protein-expression host used for recombinant production and biochemical characterization of PmHS2 wild-type and mutant proteins carried on pET-28a(+) constructs. | Commercial |
| K5AC | *E. coli* K5 Δ*kfiA* Δ*kfiC* | Clean double-knockout chassis generated by additional deletion of *kfiC* in the K5A background; used for Figure 3 benchmark validation, Pgnt-only and CRP-assisted circuit testing, PmHS2 evolution, and *kfiA*/*kfiC* system evolution. | This study |
| K5AC-NaKfiA benchmark strains | K5AC carrying pNG or pNTG-CRP plus pACYC_P34_NaKfiA(mut)_P34_*kfiC* | Dual-plasmid benchmark strains carrying wild-type NaKfiA or one of four NaKfiA variants (E74Y, I76V, T108Y, S165K) together with *kfiC*; used to evaluate Pgnt-only GFP output, CRP-assisted GFP output, tetracycline-coupled growth, and mixed-population serial-passage enrichment. | This study |

Supplementary Table S6. Plasmids used in this study

| Standardized name | Full designation / backbone | Key genetic element(s) | Primary use in this study | Source |
| --- | --- | --- | --- | --- |
| pEcCas | Cas9-expression plasmid | Cas9 nuclease expression cassette for CRISPR/Cas9-mediated editing in *E. coli* K5. | Genome editing of *kfiA* or *kfiC* loci. | Previous study / this study |
| pEcgRNA-N20-*kfiA* | gRNA plasmid | Guide RNA targeting *kfiA*. | CRISPR/Cas9 deletion or editing of *kfiA*. | This study |
| pEcgRNA-N20-*kfiC* | gRNA plasmid | Guide RNA targeting *kfiC*. | CRISPR/Cas9 deletion or editing of *kfiC*. | This study |
| pACYC_EcgRNA_N20-*kfiA* | pACYC-based gRNA plasmid | Low-copy guide RNA vector targeting *kfiA*. | Optimized genome editing in *E. coli* K5 background. | This study |
| pACYC_EcgRNA_N20-*kfiC* | pACYC-based gRNA plasmid | Low-copy guide RNA vector targeting *kfiC*. | Optimized genome editing in *E. coli* K5 background. | This study |
| pNG | pETDuet-1_Pgnt_*gfp* | Pgnt promoter fused upstream of *gfp*. | Pgnt-only GFP reporter plasmid used with pACYC-NaKfiA/*kfiC* for Figure 3 dual-plasmid benchmarking. | This study |
| pNT | pETDuet-1_Pgnt_*tetA* | Pgnt promoter fused upstream of *tetA*. | Growth-coupled selection module used to convert Pgnt output into tetracycline resistance. | This study |
| NCT | pETDuet-1_Pgnt_*tetA*_P34_CRP | Pgnt-*tetA* cassette combined with constitutive P34-driven CRP expression. | CRP-assisted sensor-selection circuit used for directed evolution and selection tests. | This study |
| pNTG-CRP | pETDuet-1_Pgnt_*tetA*_*gfp*_Pbad_*crp* | Pgnt-linked *gfp* and *tetA* outputs plus Pbad-*crp* expression module; *crp* induction with 2 mg/mL arabinose. | CRP-assisted dual-output reporter/selection plasmid used for Figure 3 fluorescence and tetracycline-growth benchmarking. | This study |
| pETDuet-1_Pgnt_*gfp*_Pbad_*grcA* | TF-screen reporter plasmid | Pgnt-*gfp* reporter combined with inducible *grcA* expression. | Candidate transcription-factor screening against Pgnt output. | This study |
| pETDuet-1_Pgnt_*gfp*_Pbad_*rdgC* | TF-screen reporter plasmid | Pgnt-*gfp* reporter combined with inducible *rdgC* expression. | Candidate transcription-factor screening against Pgnt output. | This study |
| pETDuet-1_Pgnt_*gfp*_Pbad_*ompR* | TF-screen reporter plasmid | Pgnt-*gfp* reporter combined with inducible *ompR* expression. | Candidate transcription-factor screening against Pgnt output. | This study |
| pETDuet-1_Pgnt_*gfp*_Pbad_*rluB* | TF-screen reporter plasmid | Pgnt-*gfp* reporter combined with inducible *rluB* expression. | Candidate transcription-factor screening against Pgnt output. | This study |
| pETDuet-1_Pgnt_*gfp*_Pbad_*rraA* | TF-screen reporter plasmid | Pgnt-*gfp* reporter combined with inducible *rraA* expression. | Candidate transcription-factor screening against Pgnt output. | This study |
| pETDuet-1_Pgnt_*gfp*_Pbad_*rbfA* | TF-screen reporter plasmid | Pgnt-*gfp* reporter combined with inducible *rbfA* expression. | Candidate transcription-factor screening against Pgnt output. | This study |
| pETDuet-1_Pgnt_*gfp*_Pbad_*crp* | TF-screen reporter plasmid | Pgnt-*gfp* reporter combined with inducible *crp* expression. | Candidate transcription-factor screening that nominated CRP as the highest-confidence functional modulator of Pgnt output. | This study |
| pETDuet-1_Pgnt_*gfp*_Pbad_*yihW* | TF-screen reporter plasmid | Pgnt-*gfp* reporter combined with inducible *yihW* expression. | Candidate transcription-factor screening against Pgnt output. | This study |
| pETDuet-1_Pgnt_*gfp*_Pbad_*clpB* | TF-screen reporter plasmid | Pgnt-*gfp* reporter combined with inducible *clpB* expression. | Candidate transcription-factor screening against Pgnt output. | This study |
| pETDuet-1_Pgnt_*gfp*_Pbad_*rpoD* | TF-screen reporter plasmid | Pgnt-*gfp* reporter combined with inducible *rpoD* expression. | Candidate transcription-factor screening against Pgnt output. | This study |
| pPM | pACYC_P34_PmHS2 | Constitutive P34-driven PmHS2 expression cassette on a pACYC backbone. | PmHS2 mutant-library construction and growth-coupled evolution. | This study |
| pACYC_P34_*kfiA*_P34_*kfiC* | *kfiA*/*kfiC* library vector | Dual-expression construct carrying *kfiA* and *kfiC* under P34 promoters. | Construction and propagation of the heteromeric *kfiA* mutant library with *kfiC* maintained as partner subunit. | This study |
| pSC101_MutD5 | Whole-genome dual-plasmid mutagenesis system | Low-copy mutator plasmid encoding MutD5-mediated error-prone replication functions. | Continuous whole-genome diversification coupled to the selection circuit. | This study |
| pET-28a(+)_PmHS2-WT | pET-28a(+) | Wild-type PmHS2 coding sequence. | Expression and purification of recombinant PmHS2 reference enzyme in BL21(DE3). | This study |
| pET-28a(+)_PmHS2-S130G | pET-28a(+) | PmHS2 carrying the S130G substitution. | Expression and biochemical validation of an enriched PmHS2 mutant in BL21(DE3). | This study |
| pET-28a(+)_PmHS2-L351Q | pET-28a(+) | PmHS2 carrying the L351Q substitution. | Expression and biochemical validation of an enriched PmHS2 mutant in BL21(DE3). | This study |
| pET-28a(+)_PmHS2-F364Y | pET-28a(+) | PmHS2 carrying the F364Y substitution. | Expression and biochemical validation of an enriched PmHS2 mutant in BL21(DE3). | This study |
| pET-28a(+)_PmHS2-Y530N | pET-28a(+) | PmHS2 carrying the Y530N substitution. | Expression and biochemical validation of an enriched PmHS2 mutant in BL21(DE3). | This study |
| pET-28a(+)_PmHS2-Q606E | pET-28a(+) | PmHS2 carrying the Q606E substitution. | Expression and biochemical validation of an enriched PmHS2 mutant in BL21(DE3). | This study |
| pACYC_P34_Vn_*kfiC*_P34_*kfiA*_Vc | BiFC plasmid | VN-tagged *kfiC* and VC-tagged wild-type *kfiA* under P34 promoters. | Bimolecular fluorescence complementation (BiFC) analysis of wild-type KfiA-KfiC association. | This study |
| pACYC_P34_Vn_*kfiC*_P34_kfiAM1_Vc | BiFC plasmid | VN-tagged *kfiC* and VC-tagged *kfiA* M1 variant under P34 promoters. | BiFC analysis of mutant M1 KfiA-KfiC association. | This study |
| pACYC_P34_Vn_*kfiC*_P34_kfiAM2_Vc | BiFC plasmid | VN-tagged *kfiC* and VC-tagged *kfiA* M2 variant under P34 promoters. | BiFC analysis of mutant M2 KfiA-KfiC association. | This study |
| pACYC_P34_Vn_*kfiC*_P34_kfiAM3_Vc | BiFC plasmid | VN-tagged *kfiC* and VC-tagged *kfiA* M3 variant under P34 promoters. | BiFC analysis of mutant M3 KfiA-KfiC association. | This study |
| pACYC-NaKfiA/*kfiC* | pACYC_P34_NaKfiA(mut)_P34_*kfiC* | P34-driven NaKfiA variant cassette paired with P34-driven *kfiC* on a pACYC backbone. | NaKfiA benchmark plasmid used in Figure 3; variants include WT, E74Y, I76V, T108Y and S165K. | This study |
